# Supplementary material
Source: MDPI journal article supplement (https://www.mdpi.com/2073-4441/16/8/1166)
Supplement: s1 [file s1]

Archive with 8 entries (8 files):
- Figure S1 zooplankton Grande.pdf
- Figure S2 zooplankton Delfincocha.pdf
- SUPPLEMENTARY FILE S1. photographic register of zooplankton species in the Napo and Pastaza floodplains. (1).pdf
- Supplementary File S2. Environmental parameters..xlsx
- Supplementary file S3.pdf
- Table S1 V2 Zooplankton species by site.xlsx
- Table S2 V2 Densities of zooplankton during 2021 and 2022.xlsx
- Table S3 zooplankton 24h data.xlsx
