# Supplementary material
Source: MDPI journal article supplement (https://www.mdpi.com/2073-4441/16/8/1166)
Supplement: s1 [file s1 › Supplementary File S2. Environmental parameters..xlsx]

## Sheet: TSF21
Supplementary File 2. Tables of physical and chemical water parameters used to conduct the RDA and linear models.
Table SF2.1: Physical and chemical water parameters by water body and hydrological season
		Depth (cm)	Temp (°C)	Dissolved oxygen (mg/L)	Transparence (cm)	pH	Conductivity (µS/cm)	Total dissolved solids (ppm)	Chlorophyll-a (µg/L)
Aguarico River	HW	NA	24.1	7.13	10	6.45	79.4	51.7	0.68
	RW	NA	25.79	7.8	23	6.88	58.4	38.03	1.8
Cuyabeno River	HW	265	24.7	4.2	114	5.96	11.6	7.5	1.16
	RW	325	25.3	4.1	117	5	10.18	6.61	1.7
Grande Lake	HW	320	26.8	2.6	145	5.47	8	5.1	2.82
	RW	400	25.93	0.38	114	4.58	6.63	4.28	2.83
Delfincocha Lake	HW	340	26.3	0.65	165	5.71	10.8	7	0.58
	RW	390	26.66	0.29	100	5.33	14.59	9.47	2.4
Canangueno Lake	HW	NA	NA	NA	NA	NA	NA	NA	NA
	RW	240	28.34	3.65	128	4.74	6.54	4.25	1.88
Lagartococha River	HW	570	26	0.31	155	5.51	10.3	6.7	1.19
	RW	644	27.19	0.07	110	5.06	10.11	6.58	2.44
Zábalo River	HW	NA	NA	NA	NA	NA	NA	NA	NA
	RW	455	25.05	4.54	110	5.49	4.54	10.33	1.12
Zancudococha Lake	HW	NA	NA	NA	NA	NA	NA	NA	NA
	RW	290	30.26	9.18	131	5.08	6.8	4.4	11.49
Pilchicocha Lake	HW	460	25.1	0.17	105	5.73	36.18	24.11	6.11
	RW	400	28.5	6.41	103	5.91	50	32.3	4.44
Limoncocha Lake	HW	320	27.9	12.5	26	6.69	219.6	142.7	229.7
	RW	NA	NA	NA	NA	NA	NA	NA	NA
Pañacocha Lake	HW	340	26.3	2.12	124	5.49	39.1	26	2.29
	RW	NA	NA	NA	NA	NA	NA	NA	NA
Pacuya River	HW	NA	NA	NA	NA	NA	NA	NA	NA
	RW	270	25.54	2.59	147	5.05	19.37	12.57	0.47
Kusutkao River	HW	270	22	5.5	100	5.51	42	27.3	0.73
	RW	NA	NA	NA	NA	NA	NA	NA	NA
Tinkias Lake	HW	NA	NA	NA	NA	NA	NA	NA	NA
	RW	350	24.29	7.07	26	7.07	7.07	NA	7.45

## Sheet: TSF22
Table SF2.2: Values of dissolved oxygen (mg/L) and water temperature (°C) in the three strata of Delfincocha and Limoncocha.
Delfincocha
High Waters 2021	15 h		18 h		21 h		24 h		03 h		06 h		09 h		12 h
Depth strata	T	DO	T	DO	T	DO	T	DO	T	DO	T	DO	T	DO	T	DO
50	26.3	0.27	26	0.79	26	0.61	25.9	0.5	25.9	0.46	25.8	0.38	26	0.37	26.4	0.39
150	26.1	0.19	26	0.74	25.9	0.52	25.9	0.45	25.9	0.38	25.8	0.35	25.9	0.29	26	0.28
300	25.9	0.06	25.9	0.57	25.7	0.52	25.7	0.29	25.7	0.24	25.7	0.25	25.7	0.19	25.8	0.18
Rising Waters 2022	15 h		18 h		21 h		24 h		03 h		06 h		09 h		12 h
Depth strata	T	DO	T	DO	T	DO	T	DO	T	DO	T	DO	T	DO	T	DO
50	26.91	0.11	26.85	0.17	26.8	0.14	26.81	0.18	26.75	0.39	26.66	0.42	26.64	0.27	26.8	0.14
150	26.86	0.09	26.86	0.13	26.62	0.06	26.83	0.16	26.78	0.41	26.65	0.35	26.63	0.27	26.73	0.14
300	26.88	0.08	26.74	0.09	26.47	0.01	26.82	0.16	26.44	0.12	26.64	0.36	26.64	0.27	26.71	0.13
Grande
High Waters 2021	12 h		15 h		18 h		21 h		24 h		03 h		06 h		09 h
Depth strata	T	DO	T	DO	T	DO	T	DO	T	DO	T	DO	T	DO	T	DO
50	25.5	1.8	25.8	2.47	25.4	1.67	25.5	2.6	25.3	2.82	25.1	2.58	24.8	1.8	25.1	2.2
150	24.5	0.04	24.6	0.13	24.6	0.08	24.6	0.11	24.6	0.12	24.6	0.1	24.5	0.11	24.5	0.08
300	24.2	0	24.3	0	24.3	0.01	24.4	0	24.4	0.02	24.3	0.03	24.2	0.02	24.2	0.02
Rising Waters 2022	15 h		18 h		21 h		24 h		03 h		06 h		09 h		12 h
Depth strata	T	DO	T	DO	T	DO	T	DO	T	DO	T	DO	T	DO	T	DO
50	26.58	1.04	26.1	1.99	26.65	3.4	26.44	2.47	26.2	2.57	25.94	2.66	26.51	2.89	28.23	3.07
150	24.95	0.09	25.94	1.62	25.91	1.64	25.8	1.26	25.54	0.18	25.46	0.2	25.38	0.02	25.43	0.16
300	24.62	0	24.98	0.12	24.75	0	24.74	0	24.72	0.01	24.71	0	24.74	0	24.8	0
