# Supplementary material
Source: MDPI journal article supplement (https://www.mdpi.com/2073-4441/16/8/1166)
Supplement: s1 [file s1 › Table S1 V2 Zooplankton species by site.xlsx]

## Sheet: Hoja1
	Species	Group	First record for the Ecuadorian Amazon	First record for Ecuador	Limoncocha 2021	Pañacocha 2021	Pilchicocha 2021	Pilchicocha 2022	Grange 2021	Grande 2022	Canangueno 2021	Canangueno 2022	Delficocha 2021	Delficocha 2022	Zancudococha 2022	Cuyabeno 2021	Cuyabeno 2022	Lagartococha 2021	Lagartococha 2022	Aguarico 2021	Pacuya 2022	Zabalo 2022	Kusutkao 2021	Kusutkao 2022	Tiinkias 2022
CLADOCERA	Alonella dadayi Birge, 1910	Cladocera	x	x					x	x
	Bosmina hagmanni Stingelin, 1904	Cladocera	x	x					x	x					x
	Bosminopsis brandorffi Rey & Vasquez, 1989	Cladocera	x	x					x
	Bosminopsis deitersi Richard, 1895	Cladocera	x	x			x	x	x	x	x	x		x		x	x
	Bosminopsis sp1 Richard, 1895	Cladocera	x				x	x	x	x	x	x		x
	Ceriodaphnia cornuta Sars, 1885	Cladocera	x		x
	Scapholeberis Schoedler, 1858	Cladocera	x	x					x	x		x
	Ceriodaphnia sp2 Dana, 1854	Cladocera	x						x
	Chydorus eurynotus Sars, 1901	Cladocera	x	x														x
	Daphnia gessneri Herbst, 1967	Cladocera	x	x	x				x
	Diaphanosoma polyspinum Korovchinsky, 1982	Cladocera	x	x			x	x	x	x	x	x					x
	Diaphanosoma sp1 Fischer 1850	Cladocera	x				x	x							x
	Ilyocryptus plumosus Kotov y Stifter, 2004	Cladocera	x	x					x				x	x				x	x
	Macrothrix sp1 Baird, 1843	Cladocera	x						x										x
	Macrothrix sp2 Baird, 1844	Cladocera	x										x
	Macrothrix sp3 Baird, 1845	Cladocera	x										x
	Moina cf. Rostrata McNair, 1980	Cladocera	x	x					x
	Moina minuta Hansen, 1899	Cladocera	x	x			x		x						x
ROTIFERA	Asplanchna sp1 Gosse, 1850	Rotifera					x	x	x	x	x	x		x		x		x				x
	Asplanchna sp2 Gosse, 1850	Rotifera				x	x	x	x				x	x		x	x	x	x		x
	Asplanchna sp3 Gosse, 1850	Rotifera			x	x	x	x	x		x	x	x	x		x	x	x	x		x	x			x
	Bdelloid sp1 Hudson, 1884	Rotifera											x
	Bdelloid sp2 Hudson, 1884	Rotifera											x
	Bdelloid sp3 Hudson, 1884	Rotifera			x
	Brachionus zahniseri Ahlstrom, 1934	Rotifera			x				x	x	x	x		x		x	x	x	x
	Dipleuchlanis propatula (Gosse, 1886)	Rotifera				x							x	x					x			x
	Dissotrocha Bryce, 1910	Rotifera												x				x	x
	Dissotrocha sp1 Bryce, 1910	Rotifera				x
	Euchlanis sp1 Ehrenberg, 1832	Rotifera											x
	Filinia pejleri Hutchinson, 1964	Rotifera	x	x		x		x	x	x			x	x	x		x	x	x			x
	Hexarthra intermedia braziliensis (Hauer, 1953)	Rotifera			x		x		x	x	x			x
	Keratella cochlearis (Gosse, 1851)	Rotifera			x				x		x	x				x
	Keratella sp 1 Bory de San Vicente, 1822	Rotifera														x
	Lecane bulla (Gosse, 1851)	Rotifera				x	x	x		x	x	x	x	x		x	x	x	x		x	x	x	x	x
	Lecane cf. elsa Hauer, 1931	Rotifera	x	x									x
	Lecane curvicornis (Murray, 1913)	Rotifera								x			x	x			x				x	x	x
	Lecane hamata (Stokes, 1896)	Rotifera											x
	Lecane cf tenuiseta Harring, 1914	Rotifera				x							x			x	x	x						x
	Lecane leontina (Turner, 1892)	Rotifera				x						x	x	x		x		x
	Lecane ludwigii (Eckstein, 1883)	Rotifera								x			x						x
	Lecane Monostyla sp1 (Daday, 1897)	Rotifera														x
	Lecane Monostyla sp2 (Daday, 1897)	Rotifera											x
	Lecane sp1 Nitzsch, 1827	Rotifera											x
	Lecane sp2 Nitzsch, 1827	Rotifera											x
	Lecane sp3 Nitzsch, 1827	Rotifera							x
	Lepadella sp1 Bory de San Vicente, 1826	Rotifera											x
	Macrochaetus altamirai (Arévalo, 1918)	Rotifera						x					x
	Platyias leloupi Gillard, 1957	Rotifera											x
	Platyias quadricornis brevispinus (Ehrenberg, 1832)	Rotifera											x								x
	Platyias quadricornis quadricornis (Ehrenberg, 1832)	Rotifera								x			x	x					x		x	x
	Polyarthra remata Skorikov, 1896	Rotifera			x	x	x	x	x	x	x	x	x	x				x	x		x			x
	Scaridium longicauda (Müller, 1786)	Rotifera										x	x	x					x
	Testudinella haueriensis Gillard, 1967	Rotifera				x			x		x			x		x		x		x
	Testudinella patina (Hermann, 1783)	Rotifera									x										x
	Trichocerca cf. Pusilla (Jennings, 1903)	Rotifera			x
	Trichocerca sp1 Lamarck, 1801	Rotifera			x		x		x		x		x
COPEPODA	Copepoda Calanoidea sp1 Sars, 1903	Copepoda							x
	Copepoda Calanoidea sp2 Sars, 1903	Copepoda							x
	Copepoda Calanoidea sp3 Sars, 1903	Copepoda			x		x		x		x					x
	Copepoda Calanoidea sp4 Sars, 1903	Copepoda			x									x
	Copepoda Calanoidea sp5 Sars, 1903	Copepoda			x
	Copepoda Cyclopoidea sp1 Burmeister, 1834	Copepoda							x
	Copepoda Cyclopoidea sp2 Burmeister, 1834	Copepoda							x
	Copepoda Cyclopoidea sp3 Burmeister, 1834	Copepoda							x
	Copepoda Cyclopoidea sp4 Burmeister, 1834	Copepoda			x
	Copepoda Cyclopoidea sp5 Burmeister, 1834	Copepoda			x			x
	Copepoda Cyclopoidea sp6 Burmeister, 1834	Copepoda			x				x
	Copepoda Cyclopoidea sp7 Burmeister, 1834	Copepoda			x
	Copepoda Cyclopoidea sp8 Burmeister, 1834	Copepoda							x		x
	Copepoda Herpaticoideo	Copepoda	x														x
	Arcella brasiliensis Cunha, 1913	Amoebozoa	x	x				x			x		x	x			x				x
	Arcella cf. Formosa Nicholls, 2005	Amoebozoa	x	x		x							x	x		x		x	x
	Arcella conica (Playfair, 1918)	Amoebozoa	x	x		x	x						x	x		x		x	x			x
	Arcella crenulata Deflandre, 1928	Amoebozoa	x	x						x		x	x	x			x	x	x				x	x
	Arcella gandalfi Féres et al, 2016	Amoebozoa	x	x				x					x				x				x
	Arcella gibbosa Penard, 1890	Amoebozoa	x	x				x	x				x	x		x		x	x	x	x	x	x	x	x
	Arcella hemisphaerica Perty, 1852	Amoebozoa	x	x												x		x					x
	Arcella intermedia Tsyganov y Mazei, 2006	Amoebozoa	x	x		x							x					x		x			x
	Arcella mitrata Leidy, 1876	Amoebozoa	x	x									x
	Arcella sp1 Ehrenberg, 1832	Amoebozoa	x	x									x			x
	Arcella sp2 Ehrenberg, 1832	Amoebozoa	x	x			x						x			x		x						x
	Arcella sp3 Ehrenberg, 1832	Amoebozoa	x	x									x	x					x				x	x
	Arcella sp4 Ehrenberg, 1832	Amoebozoa	x	x				x				x		x			x		x		x	x		x
	Arcella sp5 Ehrenberg, 1832	Amoebozoa	x	x									x
	Arcella vulgaris Ehrenberg, 1830	Amoebozoa	x	x		x	x						x			x	x	x	x				x	x
	Argynnia dentistoma var. Lacustris Wailes, 1912	Amoebozoa	x	x											x
	Centropyxis cf aculeata Stein, 1859	Amoebozoa	x	x									x											x
	Euglypha acanthophora (Ehrenberg, 1841)	Amoebozoa	x	x		x							x	x		x	x	x		x			x	x
	Galeripora arenaria Bonnet, 1964	Amoebozoa	x	x															x
	Galeripora cf arenaria Bonnet, 1964	Amoebozoa	x	x															x
	Galeripora megastoma (Penard, 1902)	Amoebozoa	x	x									x				x		x					x
	Galeripora cf megastoma (Penard, 1902)	Amoebozoa	x	x		x								x
	Netzelia cf corona (Wallich, 1864)	Amoebozoa	x	x									x
