# Supplementary material
Source: MDPI journal article supplement (https://www.mdpi.com/2073-4441/16/8/1166)
Supplement: s1 [file s1 › Table S2 V2 Densities of zooplankton during 2021 and 2022.xlsx]

## Sheet: Hoja1
Table S2: zooplankton densities used for the calculations of alpha, beta and gamma diversity.
Densities of Zooplankton during High Waters of 2021
Site	Bosminopsis deitersi	Bosminopsis sp	Alonella dadayi	Moina cf. rostrata	Ceriodaphnia sp1	Diaphanosoma polyspinum	Bosmina hagmanni	Ceriodaphnia cornuta	Daphnia gessneri	Bosminopsis brandorffi	Ceriodaphnia sp2	Chydorus eurynotus	Macrothrix sp1	Macrothrix sp2	Macrothrix sp3	Ilyocryptus plumosus	Moina minuta	Diaphanosoma sp2	Filinia pejleri	Testudinella haueriensis	Testudinella patina	Asplanchna sp1	Asplanchna sp2	Asplanchna sp3	Macrochaetus altamirai	Trichocerca cf. pusilla	Trichocerca sp1	Polyarthra cf dolichoptera	Brachionus zahniseri	Keratella cf cochlearis	Hexarthra intermedia braziliensis	Scaridium longicauda	Bdelloid sp.1	Bdelloid sp.2	Lepadella sp1	Lecane bulla	Lecane cf tenuiseta	Lecane Monostyla sp1	Lecane Monostyla sp2	Lecane hamata	Lecane curvicornis	Lecane cf. elsa	Lecane sp1	Lecane sp2	Lecane sp3	Lecane leontina	Dipleuchlanis propatula	Keratella sp 1	Lecane ludwigii f. ludwigii
Laguna Limoncocha_2021	0	0	0	0	0	0	0	5	1.875	0	0	0	0	0	0	0	0	0	0	0	0	0	0	10	0	65.625	1.25	48.125	0.625	362.5	26.25	0	0	0	0	0	0	0	0	0	0	0	0	0	0	0	0	0	0
Laguna Panacocha_2021	0	0	0	0	0	0	0	0	0	0	0	0	0	0	0	0	0	0	0.875	0.25	0	0	0.5	1.75	0	0	0	15.75	0	0	0	0	0	0.125	0	0.625	0.25	0	0	0	0	0	0	0	0	0.25	0.25	0	0
Laguna Delfincocha_2021	0	0	0	0.0625	0	0	0	0	0	0	0	0	0	0.0625	0.0625	0.0625	0	0	1.125	0	0	0	2.875	0.0625	0.0625	0	0.0625	0.3125	0	0	0	0.375	0.0625	0.0625	0.0625	0.8125	0.4375	0	0.0625	0.5	0.0625	0.0625	0.0625	0.0625	0	0.1875	0.0625	0	0.0625
Laguna Pilchicocha _2021	38.4375	23.75	0	0	0	0.9375	0	0	0	0	0	0	0	0	0	0	0.625	0.625	0	0	0	11.875	8.4375	0.625	0	0	0.3125	18.4375	0	0	0.625	0	0	0	0	0.3125	0	0	0	0	0	0	0	0	0	0	0	0	0
Laguna Grande Cuyabeno _2021	1.875	1.5625	0.3125	0.3125	0.3125	0.3125	0.9375	0	0.3125	0.625	0.3125	0	0.3125	0	0	0.3125	0.3125	0	0.625	0.625	0	1.25	14.6875	6.875	0	0	0.625	13.125	35.9375	16.875	4.6875	0	0	0	0	0	0	0	0	0	0	0	0	0	0.3125	0	0	0	0
Laguna Canagueno _2021	124.688	17.1875	0	0	0	1.875	0	0	0	0	0	0	0	0	0	0	0	0	0	0.3125	0.3125	0.9375	0	6.25	0	0	0.3125	0.9375	14.6875	0.9375	1.25	0	0	0	0	0.625	0	0	0	0	0	0	0	0	0	0	0	0	0
Rio Lagartococha_2021	0	0	0	0	0	0	0	0	0	0	0	0.0892857	0	0	0	0.0892857	0	0	0.0892857	0.625	0	1.42857	1.42857	2.23214	0	0	0	0.178571	0.267857	0	0	0	0.625	0	0	0.803571	0.267857	0	0	0	0	0	0	0	0	0.0892857	0	0	0
Rio Cuyabeno_2021	0.0892857	0	0	0	0	0	0	0	0	0	0	0	0	0	0	0	0	0	0	0.223214	0	0.133929	0.0892857	0.3125	0	0	0	0	0.535714	0.133929	0	0	0	0	0	0.267857	0.223214	0.0446429	0	0	0	0	0	0	0	0.0446429	0	0.0446429	0
Rio Kusutkao_2021	0	0	0	0	0	0	0	0	0	0	0	0	0	0	0	0	0	0	0	0	0	0	0	0	0	0	0	0	0	0	0	0	0	0	0	0.3125	0	0	0	0	0.03125	0	0	0	0	0	0	0	0
Aguarico - Tukunari_2021	0	0	0	0	0	0	0	0	0	0	0	0	0	0	0	0	0	0	0	0.208333	0	0	0	0	0	0	0	0	0	0	0	0	0	0	0	0	0	0	0	0	0	0	0	0	0	0	0	0	0
Densities of Zooplankton during Rising Waters of 2022
Site	Bosminopsis_deitersi	Bosminopsis_sp_	Alonella_dadayi	Ceriodaphnia_sp1	Diaphanosoma_polyspinum	Bosmina_hagmanni	Macrothrix_sp1	Ilyocryptus_plumosus	Moina_minuta	Diaphanosoma_sp2	Filinia_pejleri_	Testudinella_haueriensis	Testudinella_patina_	Asplanchna_sp1	Asplanchna_sp2	Asplanchna_sp3	Polyarthra_remata	Brachionus_zahniseri	Keratella_cochlearis	Hexarthra_intermedia_braziliensis	Scaridium_longicauda	Platyas_quadricornis_quadricornis	Platyas_quadricornis_brevispinus	Dissotrocha_guyanensis	Lecane_bulla	Lecane_cf_tenuiseta	Lecane_sp1	Lecane_cf_leontina	Dipleuchlanis_propatula	Lecane_ludwigii_f._ludwigii	Copepoda_Herpaticoideo	Copepoda_Cyclopoidea_sp5	Copepoda_Calanoidea_sp4	Arcella_gibbosa	Arcella_crenulata_	Arcella_megastoma	Arcella_conica	Arcella_gandalfi	Arcella_sp2	Arcella_cf._formosa	Arcella_sp_3	Arcella_vulgaris	Arcella_sp4	Galeripora_cf_arenaria_	Arcella_brasiliensis	Centropyxis_cf_aculeata	Argynnia_dentistoma var. lacustris	Euglypha_acanthophora
Rio_Lagartococha	0	0	0	0	0	0	0.15625	0.15625	0	0	5.625	0	0	0	0.46875	1.40625	1.25	0.15625	0	0	1.09375	0.15625	0	0.15625	1.09375	0	0	0	0.15625	0.15625	0	0	0	0.46875	1.09375	0.15625	0.46875	0	0	0	0.15625	0.78125	1.09375	0.15625	0	0	0	0
Laguna Delfincocha	6.57895	0.263158	0.263158	0	0	0	0	0.263158	0	0	28.4211	0.526316	0	1.57895	0.526316	2.63158	3.68421	0.526316	0	0.263158	0.263158	0.526316	0	0.263158	2.89474	0	1.31579	0.263158	0.263158	0	0	0	0.263158	1.31579	1.84211	0.526316	0.789474	0	0	0	0.526316	0	0.526316	0	0.526316	0	0	0.263158
Laguna Canangueno	4.21875	3.4375	0	0.15625	0.15625	0	0	0	0	0	0	0	0	5	0	1.71875	3.125	4.84375	0.15625	0	0.15625	0	0	0	0.15625	0	0	0.15625	0	0	0	0	0	0	0.625	0	0	0	0	0	0	0	2.03125	0	0	0	0	0
Laguna Pilchicocha	1.45833	0.416667	0	0	2.29167	0	0	0	0	0.833333	0.416667	0	0	0.208333	2.29167	15	0.208333	0	0	0	0	0	0	0	1.04167	0	0	0	0	0	0	0.208333	0	0.208333	0	0	0	1.04167	0	0	0	0	1.04167	0	0.416667	0	0	0
Rio Pacuya	0	0	0.397727	0	0	0	0	0	0	0	0	0	0.227273	0	0.0568182	0.568182	0.227273	0	0	0	0	0.170455	0.113636	0	0.454545	0	0.0568182	0	0	0	0	0	0	0.170455	0	0	0	0.0568182	0	0	0	0	2.5	0	0.454545	0	0	0
Rio Sabalo	0	0	0.833333	0	0	0	0	0	0	0	0.104167	0	0	0.208333	0	0.208333	0	0	0	0	0	0.9375	0	0	0.625	0	0.104167	0	0.416667	0	0	0	0	0.9375	0	0	0.416667	0	0	0	0	0	6.14583	0	0	0	0	0
Rio kusutkao	0	0	0	0	0	0	0	0	0	0	0	0	0	0	0	0	0.416667	0	0	0	0	0	0	0	0.572917	0.208333	0	0	0	0	0	0	0	0.572917	0.625	0.104167	0	0	0.3125	0.0520833	0.520833	0.416667	0.625	0	0	0.0520833	0	0.416667
Laguna Grande	1.875	16.875	1.25	0.3125	1.25	0.3125	0	0	0	0	6.25	0	0	1.875	0	0	5.625	8.4375	0	0.3125	0	0.3125	0	0	1.25	0	0.3125	0	0	0.3125	0	0	0	0	0.9375	0	0	0	0	0	0	0	0	0	0	0	0	0
Rio Cuyabeno	0.0347222	0	0	0	0.173611	0	0	0	0	0	0.138889	0	0	0	0.0694444	0.277778	0	0.416667	0	0	0	0	0	0	0.381944	0.243056	0.138889	0	0	0	0.0347222	0	0	0	0.208333	0.104167	0	0.0694444	0	0	0	0.138889	0.451389	0	0.0694444	0	0	0.0694444
Laguna Nueva tinkiias	0	0	0	0	0	0	0	0	0	0	0	0	0	0	0	0.0568182	0	0	0	0	0	0	0	0	0.170455	0	0	0	0	0	0	0	0	0.0568182	0	0	0	0	0	0	0	0	0	0	0	0	0	0
Laguna Zancudococha	0	0	0	0	0	300.625	0	0	11.25	28.75	0	0	0	0	0	0	0	0	8.75	22.5	0	0	0	0	0	0	0	0	0	0	0	0	0	0	0	0	0	0	0	0	0	0	0	0	0	0	131.875	0
[truncated: 32 more columns]
