# Supplementary material
Source: MDPI journal article supplement (https://www.mdpi.com/2073-4441/16/8/1166)
Supplement: s1 [file s1 › Table S3 zooplankton 24h data.xlsx]

## Sheet: Hoja1
Taxa	ID	Sample	Time	Stratum	N	Lake	Year	Season
Cladocera	Diaphanosoma sp1	S1	18H	A	0	Delfincocha	2021
Cladocera	Macrothrix sp2	S1	18H	A	1	Delfincocha	2021
Cladocera	Macrothrix sp3	S1	18H	A	0	Delfincocha	2021
Cladocera	Ilyocryptus (spinifer)	S1	18H	A	0	Delfincocha	2021
Rotifera	Filinia longiseta	S1	18H	A	0	Delfincocha	2021
Rotifera	Asplanchna sp1	S1	18H	A	0	Delfincocha	2021
Rotifera	Asplanchna sp2	S1	18H	A	0	Delfincocha	2021
Rotifera	Asplanchna sp3	S1	18H	A	17	Delfincocha	2021
Rotifera	Polyarthra cf dolichoptera	S1	18H	A	1	Delfincocha	2021
Rotifera	Brachionus zahniseri	S1	18H	A	0	Delfincocha	2021
Rotifera	Keratella cf cochlearis	S1	18H	A	1	Delfincocha	2021
Rotifera	Lecane bulla	S1	18H	A	1	Delfincocha	2021
Rotifera	Lecane tenuisera	S1	18H	A	1	Delfincocha	2021
Rotifera	Lecane sp1	S1	18H	A	2	Delfincocha	2021
Rotifera	Displeuchlanis propulata	S1	18H	A	0	Delfincocha	2021
Amoebozoa	Arcella cf gibbosa	S1	18H	A	11	Delfincocha	2021	HW
Amoebozoa	Arcella crenulata	S1	18H	A	3	Delfincocha	2021
Amoebozoa	Arcella intermedia	S1	18H	A	3	Delfincocha	2021
Amoebozoa	Arcella sp 1	S1	18H	A	0	Delfincocha	2021
Amoebozoa	Arcella sp 2	S1	18H	A	0	Delfincocha	2021
Amoebozoa	Arcella sp 3	S1	18H	A	0	Delfincocha	2021
Amoebozoa	Arcella sp 5	S1	18H	A	5	Delfincocha	2021
Amoebozoa	Arcella sp 6	S1	18H	A	1	Delfincocha	2021
Amoebozoa	Arcella sp 7	S1	18H	A	2	Delfincocha	2021
Amoebozoa	Arcella conica	S1	18H	A	4	Delfincocha	2021
Amoebozoa	Euglypha	S1	18H	A	2	Delfincocha	2021
Amoebozoa	Arcella ganfaldi	S1	18H	A	0	Delfincocha	2021
Rotifera	rotifero 4	S1	18H	A	0	Delfincocha	2021
Rotifera	rotifero	S1	18H	A	1	Delfincocha	2021
Copepoda	Nauplio de copepodo	S1	18H	A	1	Delfincocha	2021
Rotifera	Lecane leontina	S1	18H	A	0	Delfincocha	2021
Amoebozoa	Arcella hemisphaerica sp 26	S1	18H	A	0	Delfincocha	2021
Amoebozoa	Arcella sp.	S1	18H	A	0	Delfincocha	2021
Amoebozoa	Arcella dentada	S1	18H	A	0	Delfincocha	2021
Rotifera	Bdelloid 1	S1	18H	A	1	Delfincocha	2021
Rotifera	Bdelloid 2	S1	18H	A	0	Delfincocha	2021
Rotifera	Dipleuchlanis ?	S1	18H	A	0	Delfincocha	2021
Rotifera	Dipleuchlanis n.i	S1	18H	A	0	Delfincocha	2021
Amoebozoa	Arcella interemisferica	S1	18H	A	0	Delfincocha	2021
Amoebozoa	Arcella cf gibbosa	S1	18H	A	5	Delfincocha	2021	HW
Cladocera	Diaphanosoma sp1	S2	18H	B	0	Delfincocha	2021
Cladocera	Macrothrix sp2	S2	18H	B	0	Delfincocha	2021
Cladocera	Macrothrix sp3	S2	18H	B	0	Delfincocha	2021
Cladocera	Ilyocryptus (spinifer)	S2	18H	B	0	Delfincocha	2021
Rotifera	Filinia longiseta	S2	18H	B	0	Delfincocha	2021
Rotifera	Asplanchna sp1	S2	18H	B	0	Delfincocha	2021
Rotifera	Asplanchna sp2	S2	18H	B	0	Delfincocha	2021
Rotifera	Asplanchna sp3	S2	18H	B	9	Delfincocha	2021
Rotifera	Polyarthra cf dolichoptera	S2	18H	B	1	Delfincocha	2021
Rotifera	Brachionus zahniseri	S2	18H	B	0	Delfincocha	2021
Rotifera	Keratella cf cochlearis	S2	18H	B	0	Delfincocha	2021
Rotifera	Lecane bulla	S2	18H	B	2	Delfincocha	2021
Rotifera	Lecane tenuisera	S2	18H	B	0	Delfincocha	2021
Rotifera	Lecane sp1	S2	18H	B	1	Delfincocha	2021
Rotifera	Displeuchlanis propulata	S2	18H	B	0	Delfincocha	2021
Amoebozoa	Arcella cf gibbosa	S2	18H	B	20	Delfincocha	2021	HW
Amoebozoa	Arcella crenulata	S2	18H	B	1	Delfincocha	2021
Amoebozoa	Arcella intermedia	S2	18H	B	0	Delfincocha	2021
Amoebozoa	Arcella sp 1	S2	18H	B	0	Delfincocha	2021
Amoebozoa	Arcella sp 2	S2	18H	B	0	Delfincocha	2021
Amoebozoa	Arcella sp 3	S2	18H	B	1	Delfincocha	2021
Amoebozoa	Arcella sp 5	S2	18H	B	0	Delfincocha	2021
Amoebozoa	Arcella sp 6	S2	18H	B	2	Delfincocha	2021
Amoebozoa	Arcella sp 7	S2	18H	B	0	Delfincocha	2021
Amoebozoa	Arcella conica	S2	18H	B	0	Delfincocha	2021
Amoebozoa	Euglypha	S2	18H	B	2	Delfincocha	2021
Amoebozoa	Arcella ganfaldi	S2	18H	B	1	Delfincocha	2021
Rotifera	rotifero 4	S2	18H	B	0	Delfincocha	2021
Rotifera	rotifero	S2	18H	B	1	Delfincocha	2021
Copepoda	Nauplio de copepodo	S2	18H	B	0	Delfincocha	2021
Rotifera	Lecane leontina	S2	18H	B	1	Delfincocha	2021
Amoebozoa	Arcella hemisphaerica sp 26	S2	18H	B	0	Delfincocha	2021
Amoebozoa	Arcella sp.	S2	18H	B	0	Delfincocha	2021
Amoebozoa	Arcella dentada	S2	18H	B	0	Delfincocha	2021
Rotifera	Bdelloid 1	S2	18H	B	1	Delfincocha	2021
Rotifera	Bdelloid 2	S2	18H	B	0	Delfincocha	2021
Rotifera	Dipleuchlanis ?	S2	18H	B	1	Delfincocha	2021
Rotifera	Dipleuchlanis n.i	S2	18H	B	0	Delfincocha	2021
Amoebozoa	Arcella interemisferica	S2	18H	B	0	Delfincocha	2021
Amoebozoa	Arcella cf gibbosa	S2	18H	B	4	Delfincocha	2021	HW
Cladocera	Diaphanosoma sp1	S3	18H	C	0	Delfincocha	2021
Cladocera	Macrothrix sp2	S3	18H	C	0	Delfincocha	2021
Cladocera	Macrothrix sp3	S3	18H	C	1	Delfincocha	2021
Cladocera	Ilyocryptus (spinifer)	S3	18H	C	0	Delfincocha	2021
Rotifera	Filinia longiseta	S3	18H	C	0	Delfincocha	2021
Rotifera	Asplanchna sp1	S3	18H	C	0	Delfincocha	2021
Rotifera	Asplanchna sp2	S3	18H	C	0	Delfincocha	2021
Rotifera	Asplanchna sp3	S3	18H	C	15	Delfincocha	2021
Rotifera	Polyarthra cf dolichoptera	S3	18H	C	0	Delfincocha	2021
Rotifera	Brachionus zahniseri	S3	18H	C	0	Delfincocha	2021
Rotifera	Keratella cf cochlearis	S3	18H	C	0	Delfincocha	2021
Rotifera	Lecane bulla	S3	18H	C	1	Delfincocha	2021
Rotifera	Lecane tenuisera	S3	18H	C	1	Delfincocha	2021
Rotifera	Lecane sp1	S3	18H	C	1	Delfincocha	2021
Rotifera	Displeuchlanis propulata	S3	18H	C	0	Delfincocha	2021
Amoebozoa	Arcella cf gibbosa	S3	18H	C	8	Delfincocha	2021	HW
Amoebozoa	Arcella crenulata	S3	18H	C	0	Delfincocha	2021
Amoebozoa	Arcella intermedia	S3	18H	C	1	Delfincocha	2021
Amoebozoa	Arcella sp 1	S3	18H	C	0	Delfincocha	2021
Amoebozoa	Arcella sp 2	S3	18H	C	0	Delfincocha	2021
Amoebozoa	Arcella sp 3	S3	18H	C	0	Delfincocha	2021
Amoebozoa	Arcella sp 5	S3	18H	C	0	Delfincocha	2021
Amoebozoa	Arcella sp 6	S3	18H	C	0	Delfincocha	2021
Amoebozoa	Arcella sp 7	S3	18H	C	0	Delfincocha	2021
Amoebozoa	Arcella conica	S3	18H	C	1	Delfincocha	2021
Amoebozoa	Euglypha	S3	18H	C	2	Delfincocha	2021
Amoebozoa	Arcella ganfaldi	S3	18H	C	0	Delfincocha	2021
Rotifera	rotifero 4	S3	18H	C	0	Delfincocha	2021
Rotifera	rotifero	S3	18H	C	1	Delfincocha	2021
Copepoda	Nauplio de copepodo	S3	18H	C	0	Delfincocha	2021
Rotifera	Lecane leontina	S3	18H	C	0	Delfincocha	2021
Amoebozoa	Arcella hemisphaerica sp 26	S3	18H	C	0	Delfincocha	2021
Amoebozoa	Arcella sp.	S3	18H	C	1	Delfincocha	2021
Amoebozoa	Arcella dentada	S3	18H	C	0	Delfincocha	2021
Rotifera	Bdelloid 1	S3	18H	C	0	Delfincocha	2021
Rotifera	Bdelloid 2	S3	18H	C	0	Delfincocha	2021
Rotifera	Dipleuchlanis ?	S3	18H	C	2	Delfincocha	2021
Rotifera	Dipleuchlanis n.i	S3	18H	C	0	Delfincocha	2021
Amoebozoa	Arcella interemisferica	S3	18H	C	1	Delfincocha	2021
Amoebozoa	Arcella cf gibbosa	S3	18H	C	5	Delfincocha	2021	HW
Cladocera	Diaphanosoma sp1	S4	21H	A	0	Delfincocha	2021
Cladocera	Macrothrix sp2	S4	21H	A	0	Delfincocha	2021
Cladocera	Macrothrix sp3	S4	21H	A	0	Delfincocha	2021
Cladocera	Ilyocryptus (spinifer)	S4	21H	A	0	Delfincocha	2021
Rotifera	Filinia longiseta	S4	21H	A	0	Delfincocha	2021
Rotifera	Asplanchna sp1	S4	21H	A	0	Delfincocha	2021
Rotifera	Asplanchna sp2	S4	21H	A	0	Delfincocha	2021
Rotifera	Asplanchna sp3	S4	21H	A	20	Delfincocha	2021
Rotifera	Polyarthra cf dolichoptera	S4	21H	A	2	Delfincocha	2021
Rotifera	Brachionus zahniseri	S4	21H	A	0	Delfincocha	2021
Rotifera	Keratella cf cochlearis	S4	21H	A	0	Delfincocha	2021
Rotifera	Lecane bulla	S4	21H	A	1	Delfincocha	2021
Rotifera	Lecane tenuisera	S4	21H	A	0	Delfincocha	2021
Rotifera	Lecane sp1	S4	21H	A	1	Delfincocha	2021
Rotifera	Displeuchlanis propulata	S4	21H	A	0	Delfincocha	2021
Amoebozoa	Arcella cf gibbosa	S4	21H	A	12	Delfincocha	2021	HW
Amoebozoa	Arcella crenulata	S4	21H	A	1	Delfincocha	2021
Amoebozoa	Arcella intermedia	S4	21H	A	0	Delfincocha	2021
Amoebozoa	Arcella sp 1	S4	21H	A	0	Delfincocha	2021
Amoebozoa	Arcella sp 2	S4	21H	A	0	Delfincocha	2021
Amoebozoa	Arcella sp 3	S4	21H	A	0	Delfincocha	2021
Amoebozoa	Arcella sp 5	S4	21H	A	0	Delfincocha	2021
Amoebozoa	Arcella sp 6	S4	21H	A	1	Delfincocha	2021
Amoebozoa	Arcella sp 7	S4	21H	A	0	Delfincocha	2021
Amoebozoa	Arcella conica	S4	21H	A	2	Delfincocha	2021
Amoebozoa	Euglypha	S4	21H	A	2	Delfincocha	2021
Amoebozoa	Arcella ganfaldi	S4	21H	A	0	Delfincocha	2021
Rotifera	rotifero 4	S4	21H	A	0	Delfincocha	2021
Rotifera	rotifero	S4	21H	A	1	Delfincocha	2021
Copepoda	Nauplio de copepodo	S4	21H	A	0	Delfincocha	2021
Rotifera	Lecane leontina	S4	21H	A	0	Delfincocha	2021
Amoebozoa	Arcella hemisphaerica sp 26	S4	21H	A	0	Delfincocha	2021
Amoebozoa	Arcella sp.	S4	21H	A	1	Delfincocha	2021
Amoebozoa	Arcella dentada	S4	21H	A	0	Delfincocha	2021
Rotifera	Bdelloid 1	S4	21H	A	0	Delfincocha	2021
Rotifera	Bdelloid 2	S4	21H	A	1	Delfincocha	2021
Rotifera	Dipleuchlanis ?	S4	21H	A	0	Delfincocha	2021
Rotifera	Dipleuchlanis n.i	S4	21H	A	1	Delfincocha	2021
Amoebozoa	Arcella interemisferica	S4	21H	A	0	Delfincocha	2021
Amoebozoa	Arcella cf gibbosa	S4	21H	A	2	Delfincocha	2021	HW
Cladocera	Diaphanosoma sp1	S5	21H	B	0	Delfincocha	2021
Cladocera	Macrothrix sp2	S5	21H	B	0	Delfincocha	2021
Cladocera	Macrothrix sp3	S5	21H	B	0	Delfincocha	2021
Cladocera	Ilyocryptus (spinifer)	S5	21H	B	0	Delfincocha	2021
Rotifera	Filinia longiseta	S5	21H	B	1	Delfincocha	2021
Rotifera	Asplanchna sp1	S5	21H	B	1	Delfincocha	2021
Rotifera	Asplanchna sp2	S5	21H	B	0	Delfincocha	2021
Rotifera	Asplanchna sp3	S5	21H	B	9	Delfincocha	2021
Rotifera	Polyarthra cf dolichoptera	S5	21H	B	0	Delfincocha	2021
Rotifera	Brachionus zahniseri	S5	21H	B	0	Delfincocha	2021
Rotifera	Keratella cf cochlearis	S5	21H	B	0	Delfincocha	2021
Rotifera	Lecane bulla	S5	21H	B	0	Delfincocha	2021
Rotifera	Lecane tenuisera	S5	21H	B	0	Delfincocha	2021
Rotifera	Lecane sp1	S5	21H	B	1	Delfincocha	2021
Rotifera	Displeuchlanis propulata	S5	21H	B	0	Delfincocha	2021
Amoebozoa	Arcella cf gibbosa	S5	21H	B	11	Delfincocha	2021	HW
Amoebozoa	Arcella crenulata	S5	21H	B	4	Delfincocha	2021
Amoebozoa	Arcella intermedia	S5	21H	B	0	Delfincocha	2021
Amoebozoa	Arcella sp 1	S5	21H	B	0	Delfincocha	2021
Amoebozoa	Arcella sp 2	S5	21H	B	0	Delfincocha	2021
Amoebozoa	Arcella sp 3	S5	21H	B	0	Delfincocha	2021
Amoebozoa	Arcella sp 5	S5	21H	B	0	Delfincocha	2021
Amoebozoa	Arcella sp 6	S5	21H	B	2	Delfincocha	2021
Amoebozoa	Arcella sp 7	S5	21H	B	0	Delfincocha	2021
Amoebozoa	Arcella conica	S5	21H	B	0	Delfincocha	2021
Amoebozoa	Euglypha	S5	21H	B	0	Delfincocha	2021
Amoebozoa	Arcella ganfaldi	S5	21H	B	0	Delfincocha	2021
Rotifera	rotifero 4	S5	21H	B	0	Delfincocha	2021
Rotifera	rotifero	S5	21H	B	0	Delfincocha	2021
Copepoda	Nauplio de copepodo	S5	21H	B	0	Delfincocha	2021
Rotifera	Lecane leontina	S5	21H	B	0	Delfincocha	2021
Amoebozoa	Arcella hemisphaerica sp 26	S5	21H	B	0	Delfincocha	2021
Amoebozoa	Arcella sp.	S5	21H	B	3	Delfincocha	2021
Amoebozoa	Arcella dentada	S5	21H	B	0	Delfincocha	2021
Rotifera	Bdelloid 1	S5	21H	B	0	Delfincocha	2021
Rotifera	Bdelloid 2	S5	21H	B	0	Delfincocha	2021
Rotifera	Dipleuchlanis ?	S5	21H	B	1	Delfincocha	2021
Rotifera	Dipleuchlanis n.i	S5	21H	B	0	Delfincocha	2021
Amoebozoa	Arcella interemisferica	S5	21H	B	0	Delfincocha	2021
Amoebozoa	Arcella cf gibbosa	S5	21H	B	0	Delfincocha	2021	HW
Cladocera	Diaphanosoma sp1	S6	21H	C	0	Delfincocha	2021
Cladocera	Macrothrix sp2	S6	21H	C	0	Delfincocha	2021
Cladocera	Macrothrix sp3	S6	21H	C	0	Delfincocha	2021
Cladocera	Ilyocryptus (spinifer)	S6	21H	C	0	Delfincocha	2021
Rotifera	Filinia longiseta	S6	21H	C	0	Delfincocha	2021
Rotifera	Asplanchna sp1	S6	21H	C	0	Delfincocha	2021
Rotifera	Asplanchna sp2	S6	21H	C	0	Delfincocha	2021
Rotifera	Asplanchna sp3	S6	21H	C	6	Delfincocha	2021
Rotifera	Polyarthra cf dolichoptera	S6	21H	C	0	Delfincocha	2021
Rotifera	Brachionus zahniseri	S6	21H	C	0	Delfincocha	2021
Rotifera	Keratella cf cochlearis	S6	21H	C	0	Delfincocha	2021
Rotifera	Lecane bulla	S6	21H	C	1	Delfincocha	2021
Rotifera	Lecane tenuisera	S6	21H	C	2	Delfincocha	2021
Rotifera	Lecane sp1	S6	21H	C	0	Delfincocha	2021
Rotifera	Displeuchlanis propulata	S6	21H	C	0	Delfincocha	2021
Amoebozoa	Arcella cf gibbosa	S6	21H	C	6	Delfincocha	2021	HW
Amoebozoa	Arcella crenulata	S6	21H	C	2	Delfincocha	2021
Amoebozoa	Arcella intermedia	S6	21H	C	0	Delfincocha	2021
Amoebozoa	Arcella sp 1	S6	21H	C	1	Delfincocha	2021
Amoebozoa	Arcella sp 2	S6	21H	C	0	Delfincocha	2021
Amoebozoa	Arcella sp 3	S6	21H	C	0	Delfincocha	2021
Amoebozoa	Arcella sp 5	S6	21H	C	0	Delfincocha	2021
Amoebozoa	Arcella sp 6	S6	21H	C	0	Delfincocha	2021
Amoebozoa	Arcella sp 7	S6	21H	C	0	Delfincocha	2021
Amoebozoa	Arcella conica	S6	21H	C	0	Delfincocha	2021
Amoebozoa	Euglypha	S6	21H	C	1	Delfincocha	2021
Amoebozoa	Arcella ganfaldi	S6	21H	C	0	Delfincocha	2021
Rotifera	rotifero 4	S6	21H	C	0	Delfincocha	2021
Rotifera	rotifero	S6	21H	C	1	Delfincocha	2021
Cladocera	Nauplio de copepodo	S6	21H	C	0	Delfincocha	2021
Rotifera	Lecane leontina	S6	21H	C	0	Delfincocha	2021
Amoebozoa	Arcella hemisphaerica sp 26	S6	21H	C	0	Delfincocha	2021
Amoebozoa	Arcella sp.	S6	21H	C	0	Delfincocha	2021
Amoebozoa	Arcella dentada	S6	21H	C	0	Delfincocha	2021
Rotifera	Bdelloid 1	S6	21H	C	0	Delfincocha	2021
Rotifera	Bdelloid 2	S6	21H	C	0	Delfincocha	2021
Rotifera	Dipleuchlanis ?	S6	21H	C	0	Delfincocha	2021
Rotifera	Dipleuchlanis n.i	S6	21H	C	0	Delfincocha	2021
Amoebozoa	Arcella interemisferica	S6	21H	C	1	Delfincocha	2021
Amoebozoa	Arcella cf gibbosa	S6	21H	C	0	Delfincocha	2021	HW
Cladocera	Diaphanosoma sp1	S7	24H	A	0	Delfincocha	2021
Cladocera	Macrothrix sp2	S7	24H	A	0	Delfincocha	2021
Cladocera	Macrothrix sp3	S7	24H	A	0	Delfincocha	2021
Cladocera	Ilyocryptus (spinifer)	S7	24H	A	0	Delfincocha	2021
Rotifera	Filinia longiseta	S7	24H	A	0	Delfincocha	2021
Rotifera	Asplanchna sp1	S7	24H	A	1	Delfincocha	2021
Rotifera	Asplanchna sp2	S7	24H	A	1	Delfincocha	2021
Rotifera	Asplanchna sp3	S7	24H	A	11	Delfincocha	2021
Rotifera	Polyarthra cf dolichoptera	S7	24H	A	0	Delfincocha	2021
Rotifera	Brachionus zahniseri	S7	24H	A	0	Delfincocha	2021
Rotifera	Keratella cf cochlearis	S7	24H	A	0	Delfincocha	2021
Rotifera	Lecane bulla	S7	24H	A	0	Delfincocha	2021
Rotifera	Lecane tenuisera	S7	24H	A	0	Delfincocha	2021
Rotifera	Lecane sp1	S7	24H	A	0	Delfincocha	2021
Rotifera	Displeuchlanis propulata	S7	24H	A	0	Delfincocha	2021
Amoebozoa	Arcella cf gibbosa	S7	24H	A	6	Delfincocha	2021	HW
Amoebozoa	Arcella crenulata	S7	24H	A	3	Delfincocha	2021
Amoebozoa	Arcella intermedia	S7	24H	A	1	Delfincocha	2021
Amoebozoa	Arcella sp 1	S7	24H	A	5	Delfincocha	2021
Amoebozoa	Arcella sp 2	S7	24H	A	0	Delfincocha	2021
Amoebozoa	Arcella sp 3	S7	24H	A	0	Delfincocha	2021
Amoebozoa	Arcella sp 5	S7	24H	A	0	Delfincocha	2021
Amoebozoa	Arcella sp 6	S7	24H	A	4	Delfincocha	2021
Amoebozoa	Arcella sp 7	S7	24H	A	0	Delfincocha	2021
Amoebozoa	Arcella conica	S7	24H	A	1	Delfincocha	2021
Amoebozoa	Euglypha	S7	24H	A	2	Delfincocha	2021
Amoebozoa	Arcella ganfaldi	S7	24H	A	0	Delfincocha	2021
Rotifera	rotifero 4	S7	24H	A	0	Delfincocha	2021
Rotifera	rotifero	S7	24H	A	0	Delfincocha	2021
Copepoda	Nauplio de copepodo	S7	24H	A	0	Delfincocha	2021
Rotifera	Lecane leontina	S7	24H	A	0	Delfincocha	2021
Amoebozoa	Arcella hemisphaerica sp 26	S7	24H	A	0	Delfincocha	2021
Amoebozoa	Arcella sp.	S7	24H	A	4	Delfincocha	2021
Amoebozoa	Arcella dentada	S7	24H	A	0	Delfincocha	2021
Rotifera	Bdelloid 1	S7	24H	A	0	Delfincocha	2021
Rotifera	Bdelloid 2	S7	24H	A	0	Delfincocha	2021
Rotifera	Dipleuchlanis ?	S7	24H	A	0	Delfincocha	2021
Rotifera	Dipleuchlanis n.i	S7	24H	A	0	Delfincocha	2021
Amoebozoa	Arcella interemisferica	S7	24H	A	4	Delfincocha	2021
Amoebozoa	Arcella cf gibbosa	S7	24H	A	6	Delfincocha	2021	HW
Cladocera	Diaphanosoma sp1	S8	24H	B	0	Delfincocha	2021
Cladocera	Macrothrix sp2	S8	24H	B	0	Delfincocha	2021
Cladocera	Macrothrix sp3	S8	24H	B	0	Delfincocha	2021
Cladocera	Ilyocryptus (spinifer)	S8	24H	B	0	Delfincocha	2021
Rotifera	Filinia longiseta	S8	24H	B	0	Delfincocha	2021
Rotifera	Asplanchna sp1	S8	24H	B	2	Delfincocha	2021
Rotifera	Asplanchna sp2	S8	24H	B	1	Delfincocha	2021
Rotifera	Asplanchna sp3	S8	24H	B	16	Delfincocha	2021
Rotifera	Polyarthra cf dolichoptera	S8	24H	B	1	Delfincocha	2021
Rotifera	Brachionus zahniseri	S8	24H	B	0	Delfincocha	2021
Rotifera	Keratella cf cochlearis	S8	24H	B	0	Delfincocha	2021
Rotifera	Lecane bulla	S8	24H	B	0	Delfincocha	2021
Rotifera	Lecane tenuisera	S8	24H	B	2	Delfincocha	2021
Rotifera	Lecane sp1	S8	24H	B	1	Delfincocha	2021
Rotifera	Displeuchlanis propulata	S8	24H	B	0	Delfincocha	2021
Amoebozoa	Arcella cf gibbosa	S8	24H	B	12	Delfincocha	2021	HW
Amoebozoa	Arcella crenulata	S8	24H	B	0	Delfincocha	2021
Amoebozoa	Arcella intermedia	S8	24H	B	1	Delfincocha	2021
Amoebozoa	Arcella sp 1	S8	24H	B	1	Delfincocha	2021
Amoebozoa	Arcella sp 2	S8	24H	B	0	Delfincocha	2021
Amoebozoa	Arcella sp 3	S8	24H	B	0	Delfincocha	2021
Amoebozoa	Arcella sp 5	S8	24H	B	1	Delfincocha	2021
Amoebozoa	Arcella sp 6	S8	24H	B	0	Delfincocha	2021
Amoebozoa	Arcella sp 7	S8	24H	B	0	Delfincocha	2021
Amoebozoa	Arcella conica	S8	24H	B	1	Delfincocha	2021
Amoebozoa	Euglypha	S8	24H	B	1	Delfincocha	2021
Amoebozoa	Arcella ganfaldi	S8	24H	B	0	Delfincocha	2021
Rotifera	rotifero 4	S8	24H	B	1	Delfincocha	2021
Rotifera	rotifero	S8	24H	B	0	Delfincocha	2021
Copepoda	Nauplio de copepodo	S8	24H	B	0	Delfincocha	2021
Rotifera	Lecane leontina	S8	24H	B	0	Delfincocha	2021
Amoebozoa	Arcella hemisphaerica sp 26	S8	24H	B	0	Delfincocha	2021
Amoebozoa	Arcella sp.	S8	24H	B	2	Delfincocha	2021
Amoebozoa	Arcella dentada	S8	24H	B	0	Delfincocha	2021
Rotifera	Bdelloid 1	S8	24H	B	1	Delfincocha	2021
Rotifera	Bdelloid 2	S8	24H	B	0	Delfincocha	2021
Rotifera	Dipleuchlanis ?	S8	24H	B	0	Delfincocha	2021
Rotifera	Dipleuchlanis n.i	S8	24H	B	0	Delfincocha	2021
Amoebozoa	Arcella interemisferica	S8	24H	B	0	Delfincocha	2021
Amoebozoa	Arcella cf gibbosa	S8	24H	B	0	Delfincocha	2021	HW
Cladocera	Diaphanosoma sp1	S9	24H	C	0	Delfincocha	2021
Cladocera	Macrothrix sp2	S9	24H	C	0	Delfincocha	2021
Cladocera	Macrothrix sp3	S9	24H	C	0	Delfincocha	2021
Cladocera	Ilyocryptus (spinifer)	S9	24H	C	0	Delfincocha	2021
Rotifera	Filinia longiseta	S9	24H	C	2	Delfincocha	2021
Rotifera	Asplanchna sp1	S9	24H	C	0	Delfincocha	2021
Rotifera	Asplanchna sp2	S9	24H	C	0	Delfincocha	2021
Rotifera	Asplanchna sp3	S9	24H	C	7	Delfincocha	2021
Rotifera	Polyarthra cf dolichoptera	S9	24H	C	0	Delfincocha	2021
Rotifera	Brachionus zahniseri	S9	24H	C	0	Delfincocha	2021
Rotifera	Keratella cf cochlearis	S9	24H	C	0	Delfincocha	2021
Rotifera	Lecane bulla	S9	24H	C	0	Delfincocha	2021
Rotifera	Lecane tenuisera	S9	24H	C	1	Delfincocha	2021
Rotifera	Lecane sp1	S9	24H	C	0	Delfincocha	2021
Rotifera	Displeuchlanis propulata	S9	24H	C	0	Delfincocha	2021
Amoebozoa	Arcella cf gibbosa	S9	24H	C	9	Delfincocha	2021	HW
Amoebozoa	Arcella crenulata	S9	24H	C	2	Delfincocha	2021
Amoebozoa	Arcella intermedia	S9	24H	C	3	Delfincocha	2021
Amoebozoa	Arcella sp 1	S9	24H	C	0	Delfincocha	2021
Amoebozoa	Arcella sp 2	S9	24H	C	0	Delfincocha	2021
Amoebozoa	Arcella sp 3	S9	24H	C	0	Delfincocha	2021
Amoebozoa	Arcella sp 5	S9	24H	C	0	Delfincocha	2021
Amoebozoa	Arcella sp 6	S9	24H	C	0	Delfincocha	2021
Amoebozoa	Arcella sp 7	S9	24H	C	0	Delfincocha	2021
Amoebozoa	Arcella conica	S9	24H	C	2	Delfincocha	2021
Amoebozoa	Euglypha	S9	24H	C	0	Delfincocha	2021
Amoebozoa	Arcella ganfaldi	S9	24H	C	2	Delfincocha	2021
Rotifera	rotifero 4	S9	24H	C	0	Delfincocha	2021
Rotifera	rotifero	S9	24H	C	0	Delfincocha	2021
Copepoda	Nauplio de copepodo	S9	24H	C	0	Delfincocha	2021
Rotifera	Lecane leontina	S9	24H	C	0	Delfincocha	2021
Amoebozoa	Arcella hemisphaerica sp 26	S9	24H	C	0	Delfincocha	2021
Amoebozoa	Arcella sp.	S9	24H	C	2	Delfincocha	2021
Amoebozoa	Arcella dentada	S9	24H	C	0	Delfincocha	2021
Rotifera	Bdelloid 1	S9	24H	C	0	Delfincocha	2021
Rotifera	Bdelloid 2	S9	24H	C	0	Delfincocha	2021
Rotifera	Dipleuchlanis ?	S9	24H	C	0	Delfincocha	2021
Rotifera	Dipleuchlanis n.i	S9	24H	C	0	Delfincocha	2021
Amoebozoa	Arcella interemisferica	S9	24H	C	2	Delfincocha	2021
Amoebozoa	Arcella cf gibbosa	S9	24H	C	5	Delfincocha	2021	HW
Cladocera	Diaphanosoma sp1	S10	03H	A	0	Delfincocha	2021
Cladocera	Macrothrix sp2	S10	03H	A	0	Delfincocha	2021
Cladocera	Macrothrix sp3	S10	03H	A	0	Delfincocha	2021
Cladocera	Ilyocryptus (spinifer)	S10	03H	A	0	Delfincocha	2021
Rotifera	Filinia longiseta	S10	03H	A	1	Delfincocha	2021
Rotifera	Asplanchna sp1	S10	03H	A	0	Delfincocha	2021
Rotifera	Asplanchna sp2	S10	03H	A	0	Delfincocha	2021
Rotifera	Asplanchna sp3	S10	03H	A	13	Delfincocha	2021
Rotifera	Polyarthra cf dolichoptera	S10	03H	A	2	Delfincocha	2021
Rotifera	Brachionus zahniseri	S10	03H	A	0	Delfincocha	2021
Rotifera	Keratella cf cochlearis	S10	03H	A	0	Delfincocha	2021
Rotifera	Lecane bulla	S10	03H	A	1	Delfincocha	2021
Rotifera	Lecane tenuisera	S10	03H	A	0	Delfincocha	2021
Rotifera	Lecane sp1	S10	03H	A	1	Delfincocha	2021
Rotifera	Displeuchlanis propulata	S10	03H	A	0	Delfincocha	2021
Amoebozoa	Arcella cf gibbosa	S10	03H	A	10	Delfincocha	2021	HW
Amoebozoa	Arcella crenulata	S10	03H	A	6	Delfincocha	2021
Amoebozoa	Arcella intermedia	S10	03H	A	0	Delfincocha	2021
Amoebozoa	Arcella sp 1	S10	03H	A	2	Delfincocha	2021
Amoebozoa	Arcella sp 2	S10	03H	A	0	Delfincocha	2021
Amoebozoa	Arcella sp 3	S10	03H	A	0	Delfincocha	2021
Amoebozoa	Arcella sp 5	S10	03H	A	0	Delfincocha	2021
Amoebozoa	Arcella sp 6	S10	03H	A	3	Delfincocha	2021
Amoebozoa	Arcella sp 7	S10	03H	A	1	Delfincocha	2021
Amoebozoa	Arcella conica	S10	03H	A	1	Delfincocha	2021
Amoebozoa	Euglypha	S10	03H	A	0	Delfincocha	2021
Amoebozoa	Arcella ganfaldi	S10	03H	A	0	Delfincocha	2021
Rotifera	rotifero 4	S10	03H	A	0	Delfincocha	2021
Rotifera	rotifero	S10	03H	A	0	Delfincocha	2021
Copepoda	Nauplio de copepodo	S10	03H	A	0	Delfincocha	2021
Rotifera	Lecane leontina	S10	03H	A	0	Delfincocha	2021
Amoebozoa	Arcella hemisphaerica sp 26	S10	03H	A	0	Delfincocha	2021
Amoebozoa	Arcella sp.	S10	03H	A	1	Delfincocha	2021
Amoebozoa	Arcella dentada	S10	03H	A	0	Delfincocha	2021
Rotifera	Bdelloid 1	S10	03H	A	0	Delfincocha	2021
Rotifera	Bdelloid 2	S10	03H	A	0	Delfincocha	2021
Rotifera	Dipleuchlanis ?	S10	03H	A	0	Delfincocha	2021
Rotifera	Dipleuchlanis n.i	S10	03H	A	0	Delfincocha	2021
Amoebozoa	Arcella interemisferica	S10	03H	A	0	Delfincocha	2021
Amoebozoa	Arcella cf gibbosa	S10	03H	A	10	Delfincocha	2021	HW
Cladocera	Diaphanosoma sp1	S11	03H	B	0	Delfincocha	2021
Cladocera	Macrothrix sp2	S11	03H	B	0	Delfincocha	2021
Cladocera	Macrothrix sp3	S11	03H	B	0	Delfincocha	2021
Cladocera	Ilyocryptus (spinifer)	S11	03H	B	0	Delfincocha	2021
Rotifera	Filinia longiseta	S11	03H	B	0	Delfincocha	2021
Rotifera	Asplanchna sp1	S11	03H	B	0	Delfincocha	2021
Rotifera	Asplanchna sp2	S11	03H	B	0	Delfincocha	2021
Rotifera	Asplanchna sp3	S11	03H	B	15	Delfincocha	2021
Rotifera	Polyarthra cf dolichoptera	S11	03H	B	0	Delfincocha	2021
Rotifera	Brachionus zahniseri	S11	03H	B	1	Delfincocha	2021
Rotifera	Keratella cf cochlearis	S11	03H	B	0	Delfincocha	2021
Rotifera	Lecane bulla	S11	03H	B	1	Delfincocha	2021
Rotifera	Lecane tenuisera	S11	03H	B	0	Delfincocha	2021
Rotifera	Lecane sp1	S11	03H	B	0	Delfincocha	2021
Rotifera	Displeuchlanis propulata	S11	03H	B	2	Delfincocha	2021
Amoebozoa	Arcella cf gibbosa	S11	03H	B	8	Delfincocha	2021	HW
Amoebozoa	Arcella crenulata	S11	03H	B	3	Delfincocha	2021
Amoebozoa	Arcella intermedia	S11	03H	B	2	Delfincocha	2021
Amoebozoa	Arcella sp 1	S11	03H	B	0	Delfincocha	2021
Amoebozoa	Arcella sp 2	S11	03H	B	0	Delfincocha	2021
Amoebozoa	Arcella sp 3	S11	03H	B	0	Delfincocha	2021
Amoebozoa	Arcella sp 5	S11	03H	B	3	Delfincocha	2021
Amoebozoa	Arcella sp 6	S11	03H	B	0	Delfincocha	2021
Amoebozoa	Arcella sp 7	S11	03H	B	0	Delfincocha	2021
Amoebozoa	Arcella conica	S11	03H	B	3	Delfincocha	2021
Amoebozoa	Euglypha	S11	03H	B	0	Delfincocha	2021
Amoebozoa	Arcella ganfaldi	S11	03H	B	0	Delfincocha	2021
Rotifera	rotifero 4	S11	03H	B	0	Delfincocha	2021
Rotifera	rotifero	S11	03H	B	0	Delfincocha	2021
Copepoda	Nauplio de copepodo	S11	03H	B	0	Delfincocha	2021
Rotifera	Lecane leontina	S11	03H	B	0	Delfincocha	2021
Amoebozoa	Arcella hemisphaerica sp 26	S11	03H	B	0	Delfincocha	2021
Amoebozoa	Arcella sp.	S11	03H	B	2	Delfincocha	2021
Amoebozoa	Arcella dentada	S11	03H	B	0	Delfincocha	2021
Rotifera	Bdelloid 1	S11	03H	B	0	Delfincocha	2021
Rotifera	Bdelloid 2	S11	03H	B	0	Delfincocha	2021
Rotifera	Dipleuchlanis ?	S11	03H	B	1	Delfincocha	2021
Rotifera	Dipleuchlanis n.i	S11	03H	B	0	Delfincocha	2021
Amoebozoa	Arcella interemisferica	S11	03H	B	0	Delfincocha	2021
Amoebozoa	Arcella cf gibbosa	S11	03H	B	8	Delfincocha	2021	HW
Cladocera	Diaphanosoma sp1	S12	03H	C	0	Delfincocha	2021
Cladocera	Macrothrix sp2	S12	03H	C	0	Delfincocha	2021
Cladocera	Macrothrix sp3	S12	03H	C	0	Delfincocha	2021
Cladocera	Ilyocryptus (spinifer)	S12	03H	C	0	Delfincocha	2021
Rotifera	Filinia longiseta	S12	03H	C	3	Delfincocha	2021
Rotifera	Asplanchna sp1	S12	03H	C	0	Delfincocha	2021
Rotifera	Asplanchna sp2	S12	03H	C	0	Delfincocha	2021
Rotifera	Asplanchna sp3	S12	03H	C	4	Delfincocha	2021
Rotifera	Polyarthra cf dolichoptera	S12	03H	C	0	Delfincocha	2021
Rotifera	Brachionus zahniseri	S12	03H	C	0	Delfincocha	2021
Rotifera	Keratella cf cochlearis	S12	03H	C	0	Delfincocha	2021
Rotifera	Lecane bulla	S12	03H	C	2	Delfincocha	2021
Rotifera	Lecane tenuisera	S12	03H	C	2	Delfincocha	2021
Rotifera	Lecane sp1	S12	03H	C	0	Delfincocha	2021
Rotifera	Displeuchlanis propulata	S12	03H	C	1	Delfincocha	2021
Amoebozoa	Arcella cf gibbosa	S12	03H	C	6	Delfincocha	2021	HW
Amoebozoa	Arcella crenulata	S12	03H	C	3	Delfincocha	2021
Amoebozoa	Arcella intermedia	S12	03H	C	1	Delfincocha	2021
Amoebozoa	Arcella sp 1	S12	03H	C	0	Delfincocha	2021
Amoebozoa	Arcella sp 2	S12	03H	C	0	Delfincocha	2021
Amoebozoa	Arcella sp 3	S12	03H	C	0	Delfincocha	2021
Amoebozoa	Arcella sp 5	S12	03H	C	0	Delfincocha	2021
Amoebozoa	Arcella sp 6	S12	03H	C	4	Delfincocha	2021
Amoebozoa	Arcella sp 7	S12	03H	C	0	Delfincocha	2021
Amoebozoa	Arcella conica	S12	03H	C	2	Delfincocha	2021
Amoebozoa	Euglypha	S12	03H	C	0	Delfincocha	2021
Amoebozoa	Arcella ganfaldi	S12	03H	C	0	Delfincocha	2021
Rotifera	rotifero 4	S12	03H	C	0	Delfincocha	2021
Rotifera	rotifero	S12	03H	C	0	Delfincocha	2021
Copepoda	Nauplio de copepodo	S12	03H	C	1	Delfincocha	2021
Rotifera	Lecane leontina	S12	03H	C	0	Delfincocha	2021
Amoebozoa	Arcella hemisphaerica sp 26	S12	03H	C	0	Delfincocha	2021
Amoebozoa	Arcella sp.	S12	03H	C	1	Delfincocha	2021
Amoebozoa	Arcella dentada	S12	03H	C	1	Delfincocha	2021
Rotifera	Bdelloid 1	S12	03H	C	0	Delfincocha	2021
Rotifera	Bdelloid 2	S12	03H	C	0	Delfincocha	2021
Rotifera	Dipleuchlanis ?	S12	03H	C	0	Delfincocha	2021
Rotifera	Dipleuchlanis n.i	S12	03H	C	0	Delfincocha	2021
Amoebozoa	Arcella interemisferica	S12	03H	C	0	Delfincocha	2021
Amoebozoa	Arcella cf gibbosa	S12	03H	C	4	Delfincocha	2021	HW
Cladocera	Diaphanosoma sp1	S13	06H	A	0	Delfincocha	2021
Cladocera	Macrothrix sp2	S13	06H	A	0	Delfincocha	2021
Cladocera	Macrothrix sp3	S13	06H	A	0	Delfincocha	2021
Cladocera	Ilyocryptus (spinifer)	S13	06H	A	0	Delfincocha	2021
Rotifera	Filinia longiseta	S13	06H	A	1	Delfincocha	2021
Rotifera	Asplanchna sp1	S13	06H	A	0	Delfincocha	2021
Rotifera	Asplanchna sp2	S13	06H	A	0	Delfincocha	2021
Rotifera	Asplanchna sp3	S13	06H	A	14	Delfincocha	2021
Rotifera	Polyarthra cf dolichoptera	S13	06H	A	2	Delfincocha	2021
Rotifera	Brachionus zahniseri	S13	06H	A	0	Delfincocha	2021
Rotifera	Keratella cf cochlearis	S13	06H	A	0	Delfincocha	2021
Rotifera	Lecane bulla	S13	06H	A	0	Delfincocha	2021
Rotifera	Lecane tenuisera	S13	06H	A	1	Delfincocha	2021
Rotifera	Lecane sp1	S13	06H	A	1	Delfincocha	2021
Rotifera	Displeuchlanis propulata	S13	06H	A	0	Delfincocha	2021
Amoebozoa	Arcella cf gibbosa	S13	06H	A	10	Delfincocha	2021	HW
Amoebozoa	Arcella crenulata	S13	06H	A	1	Delfincocha	2021
Amoebozoa	Arcella intermedia	S13	06H	A	0	Delfincocha	2021
Amoebozoa	Arcella sp 1	S13	06H	A	0	Delfincocha	2021
Amoebozoa	Arcella sp 2	S13	06H	A	0	Delfincocha	2021
Amoebozoa	Arcella sp 3	S13	06H	A	0	Delfincocha	2021
Amoebozoa	Arcella sp 5	S13	06H	A	0	Delfincocha	2021
Amoebozoa	Arcella sp 6	S13	06H	A	1	Delfincocha	2021
Amoebozoa	Arcella sp 7	S13	06H	A	0	Delfincocha	2021
Amoebozoa	Arcella conica	S13	06H	A	1	Delfincocha	2021
Amoebozoa	Euglypha	S13	06H	A	0	Delfincocha	2021
Amoebozoa	Arcella ganfaldi	S13	06H	A	0	Delfincocha	2021
Rotifera	rotifero 4	S13	06H	A	0	Delfincocha	2021
Rotifera	rotifero	S13	06H	A	0	Delfincocha	2021
Cladocera	Nauplio de copepodo	S13	06H	A	0	Delfincocha	2021
Rotifera	Lecane leontina	S13	06H	A	0	Delfincocha	2021
Amoebozoa	Arcella hemisphaerica sp 26	S13	06H	A	0	Delfincocha	2021
Amoebozoa	Arcella sp.	S13	06H	A	0	Delfincocha	2021
Amoebozoa	Arcella dentada	S13	06H	A	0	Delfincocha	2021
Rotifera	Bdelloid 1	S13	06H	A	0	Delfincocha	2021
Rotifera	Bdelloid 2	S13	06H	A	0	Delfincocha	2021
Rotifera	Dipleuchlanis ?	S13	06H	A	0	Delfincocha	2021
Rotifera	Dipleuchlanis n.i	S13	06H	A	0	Delfincocha	2021
Amoebozoa	Arcella interemisferica	S13	06H	A	0	Delfincocha	2021
Amoebozoa	Arcella cf gibbosa	S13	06H	A	8	Delfincocha	2021	HW
Cladocera	Diaphanosoma sp1	S14	06H	B	0	Delfincocha	2021
Cladocera	Macrothrix sp2	S14	06H	B	0	Delfincocha	2021
Cladocera	Macrothrix sp3	S14	06H	B	0	Delfincocha	2021
Cladocera	Ilyocryptus (spinifer)	S14	06H	B	0	Delfincocha	2021
Rotifera	Filinia longiseta	S14	06H	B	0	Delfincocha	2021
Rotifera	Asplanchna sp1	S14	06H	B	0	Delfincocha	2021
Rotifera	Asplanchna sp2	S14	06H	B	0	Delfincocha	2021
Rotifera	Asplanchna sp3	S14	06H	B	4	Delfincocha	2021
Rotifera	Polyarthra cf dolichoptera	S14	06H	B	0	Delfincocha	2021
Rotifera	Brachionus zahniseri	S14	06H	B	0	Delfincocha	2021
Rotifera	Keratella cf cochlearis	S14	06H	B	0	Delfincocha	2021
Rotifera	Lecane bulla	S14	06H	B	1	Delfincocha	2021
Rotifera	Lecane tenuisera	S14	06H	B	1	Delfincocha	2021
Rotifera	Lecane sp1	S14	06H	B	0	Delfincocha	2021
Rotifera	Displeuchlanis propulata	S14	06H	B	0	Delfincocha	2021
Amoebozoa	Arcella cf gibbosa	S14	06H	B	13	Delfincocha	2021	HW
Amoebozoa	Arcella crenulata	S14	06H	B	3	Delfincocha	2021
Amoebozoa	Arcella intermedia	S14	06H	B	1	Delfincocha	2021
Amoebozoa	Arcella sp 1	S14	06H	B	0	Delfincocha	2021
Amoebozoa	Arcella sp 2	S14	06H	B	0	Delfincocha	2021
Amoebozoa	Arcella sp 3	S14	06H	B	0	Delfincocha	2021
Amoebozoa	Arcella sp 5	S14	06H	B	1	Delfincocha	2021
Amoebozoa	Arcella sp 6	S14	06H	B	0	Delfincocha	2021
Amoebozoa	Arcella sp 7	S14	06H	B	0	Delfincocha	2021
Amoebozoa	Arcella conica	S14	06H	B	3	Delfincocha	2021
Amoebozoa	Euglypha	S14	06H	B	2	Delfincocha	2021
Amoebozoa	Arcella ganfaldi	S14	06H	B	0	Delfincocha	2021
Rotifera	rotifero 4	S14	06H	B	0	Delfincocha	2021
Rotifera	rotifero	S14	06H	B	0	Delfincocha	2021
Copepoda	Nauplio de copepodo	S14	06H	B	0	Delfincocha	2021
Rotifera	Lecane leontina	S14	06H	B	0	Delfincocha	2021
Amoebozoa	Arcella hemisphaerica sp 26	S14	06H	B	0	Delfincocha	2021
Amoebozoa	Arcella sp.	S14	06H	B	1	Delfincocha	2021
Amoebozoa	Arcella dentada	S14	06H	B	0	Delfincocha	2021
Rotifera	Bdelloid 1	S14	06H	B	0	Delfincocha	2021
Rotifera	Bdelloid 2	S14	06H	B	0	Delfincocha	2021
Rotifera	Dipleuchlanis ?	S14	06H	B	0	Delfincocha	2021
Rotifera	Dipleuchlanis n.i	S14	06H	B	0	Delfincocha	2021
Amoebozoa	Arcella interemisferica	S14	06H	B	1	Delfincocha	2021
Amoebozoa	Arcella cf gibbosa	S14	06H	B	7	Delfincocha	2021	HW
Cladocera	Diaphanosoma sp1	S15	06H	C	0	Delfincocha	2021
Cladocera	Macrothrix sp2	S15	06H	C	1	Delfincocha	2021
Cladocera	Macrothrix sp3	S15	06H	C	0	Delfincocha	2021
Cladocera	Ilyocryptus (spinifer)	S15	06H	C	0	Delfincocha	2021
Rotifera	Filinia longiseta	S15	06H	C	2	Delfincocha	2021
Rotifera	Asplanchna sp1	S15	06H	C	0	Delfincocha	2021
Rotifera	Asplanchna sp2	S15	06H	C	0	Delfincocha	2021
Rotifera	Asplanchna sp3	S15	06H	C	19	Delfincocha	2021
Rotifera	Polyarthra cf dolichoptera	S15	06H	C	2	Delfincocha	2021
Rotifera	Brachionus zahniseri	S15	06H	C	0	Delfincocha	2021
Rotifera	Keratella cf cochlearis	S15	06H	C	0	Delfincocha	2021
Rotifera	Lecane bulla	S15	06H	C	0	Delfincocha	2021
Rotifera	Lecane tenuisera	S15	06H	C	4	Delfincocha	2021
Rotifera	Lecane sp1	S15	06H	C	0	Delfincocha	2021
Rotifera	Displeuchlanis propulata	S15	06H	C	0	Delfincocha	2021
Amoebozoa	Arcella cf gibbosa	S15	06H	C	10	Delfincocha	2021	HW
Amoebozoa	Arcella crenulata	S15	06H	C	2	Delfincocha	2021
Amoebozoa	Arcella intermedia	S15	06H	C	0	Delfincocha	2021
Amoebozoa	Arcella sp 1	S15	06H	C	0	Delfincocha	2021
Amoebozoa	Arcella sp 2	S15	06H	C	0	Delfincocha	2021
Amoebozoa	Arcella sp 3	S15	06H	C	1	Delfincocha	2021
Amoebozoa	Arcella sp 5	S15	06H	C	0	Delfincocha	2021
Amoebozoa	Arcella sp 6	S15	06H	C	1	Delfincocha	2021
Amoebozoa	Arcella sp 7	S15	06H	C	0	Delfincocha	2021
Amoebozoa	Arcella conica	S15	06H	C	0	Delfincocha	2021
Amoebozoa	Euglypha	S15	06H	C	1	Delfincocha	2021
Amoebozoa	Arcella ganfaldi	S15	06H	C	0	Delfincocha	2021
Rotifera	rotifero 4	S15	06H	C	0	Delfincocha	2021
Rotifera	rotifero	S15	06H	C	0	Delfincocha	2021
Copepoda	Nauplio de copepodo	S15	06H	C	0	Delfincocha	2021
Rotifera	Lecane leontina	S15	06H	C	0	Delfincocha	2021
Amoebozoa	Arcella hemisphaerica sp 26	S15	06H	C	0	Delfincocha	2021
Amoebozoa	Arcella sp.	S15	06H	C	2	Delfincocha	2021
Amoebozoa	Arcella dentada	S15	06H	C	0	Delfincocha	2021
Rotifera	Bdelloid 1	S15	06H	C	0	Delfincocha	2021
Rotifera	Bdelloid 2	S15	06H	C	0	Delfincocha	2021
Rotifera	Dipleuchlanis ?	S15	06H	C	0	Delfincocha	2021
Rotifera	Dipleuchlanis n.i	S15	06H	C	0	Delfincocha	2021
Amoebozoa	Arcella interemisferica	S15	06H	C	1	Delfincocha	2021
Amoebozoa	Arcella cf gibbosa	S15	06H	C	6	Delfincocha	2021	HW
Cladocera	Diaphanosoma sp1	S16	09H	A	0	Delfincocha	2021
Cladocera	Macrothrix sp2	S16	09H	A	0	Delfincocha	2021
Cladocera	Macrothrix sp3	S16	09H	A	1	Delfincocha	2021
Cladocera	Ilyocryptus (spinifer)	S16	09H	A	0	Delfincocha	2021
Rotifera	Filinia longiseta	S16	09H	A	0	Delfincocha	2021
Rotifera	Asplanchna sp1	S16	09H	A	0	Delfincocha	2021
Rotifera	Asplanchna sp2	S16	09H	A	2	Delfincocha	2021
Rotifera	Asplanchna sp3	S16	09H	A	11	Delfincocha	2021
Rotifera	Polyarthra cf dolichoptera	S16	09H	A	0	Delfincocha	2021
Rotifera	Brachionus zahniseri	S16	09H	A	0	Delfincocha	2021
Rotifera	Keratella cf cochlearis	S16	09H	A	0	Delfincocha	2021
Rotifera	Lecane bulla	S16	09H	A	0	Delfincocha	2021
Rotifera	Lecane tenuisera	S16	09H	A	0	Delfincocha	2021
Rotifera	Lecane sp1	S16	09H	A	1	Delfincocha	2021
Rotifera	Displeuchlanis propulata	S16	09H	A	0	Delfincocha	2021
Amoebozoa	Arcella cf gibbosa	S16	09H	A	6	Delfincocha	2021	HW
Amoebozoa	Arcella crenulata	S16	09H	A	0	Delfincocha	2021
Amoebozoa	Arcella intermedia	S16	09H	A	0	Delfincocha	2021
Amoebozoa	Arcella sp 1	S16	09H	A	0	Delfincocha	2021
Amoebozoa	Arcella sp 2	S16	09H	A	0	Delfincocha	2021
Amoebozoa	Arcella sp 3	S16	09H	A	0	Delfincocha	2021
Amoebozoa	Arcella sp 5	S16	09H	A	0	Delfincocha	2021
Amoebozoa	Arcella sp 6	S16	09H	A	0	Delfincocha	2021
Amoebozoa	Arcella sp 7	S16	09H	A	0	Delfincocha	2021
Amoebozoa	Arcella conica	S16	09H	A	0	Delfincocha	2021
Amoebozoa	Euglypha	S16	09H	A	1	Delfincocha	2021
Amoebozoa	Arcella ganfaldi	S16	09H	A	0	Delfincocha	2021
Rotifera	rotifero 4	S16	09H	A	0	Delfincocha	2021
Rotifera	rotifero	S16	09H	A	0	Delfincocha	2021
Copepoda	Nauplio de copepodo	S16	09H	A	1	Delfincocha	2021
Rotifera	Lecane leontina	S16	09H	A	0	Delfincocha	2021
Amoebozoa	Arcella hemisphaerica sp 26	S16	09H	A	0	Delfincocha	2021
Amoebozoa	Arcella sp.	S16	09H	A	0	Delfincocha	2021
Amoebozoa	Arcella dentada	S16	09H	A	0	Delfincocha	2021
Rotifera	Bdelloid 1	S16	09H	A	0	Delfincocha	2021
Rotifera	Bdelloid 2	S16	09H	A	0	Delfincocha	2021
Rotifera	Dipleuchlanis ?	S16	09H	A	0	Delfincocha	2021
Rotifera	Dipleuchlanis n.i	S16	09H	A	0	Delfincocha	2021
Amoebozoa	Arcella interemisferica	S16	09H	A	0	Delfincocha	2021
Amoebozoa	Arcella cf gibbosa	S16	09H	A	8	Delfincocha	2021	HW
Cladocera	Diaphanosoma sp1	S17	09H	B	0	Delfincocha	2021
Cladocera	Macrothrix sp2	S17	09H	B	0	Delfincocha	2021
Cladocera	Macrothrix sp3	S17	09H	B	0	Delfincocha	2021
Cladocera	Ilyocryptus (spinifer)	S17	09H	B	1	Delfincocha	2021
Rotifera	Filinia longiseta	S17	09H	B	3	Delfincocha	2021
Rotifera	Asplanchna sp1	S17	09H	B	0	Delfincocha	2021
Rotifera	Asplanchna sp2	S17	09H	B	3	Delfincocha	2021
Rotifera	Asplanchna sp3	S17	09H	B	15	Delfincocha	2021
Rotifera	Polyarthra cf dolichoptera	S17	09H	B	0	Delfincocha	2021
Rotifera	Brachionus zahniseri	S17	09H	B	0	Delfincocha	2021
Rotifera	Keratella cf cochlearis	S17	09H	B	0	Delfincocha	2021
Rotifera	Lecane bulla	S17	09H	B	1	Delfincocha	2021
Rotifera	Lecane tenuisera	S17	09H	B	0	Delfincocha	2021
Rotifera	Lecane sp1	S17	09H	B	0	Delfincocha	2021
Rotifera	Displeuchlanis propulata	S17	09H	B	0	Delfincocha	2021
Amoebozoa	Arcella cf gibbosa	S17	09H	B	17	Delfincocha	2021	HW
Amoebozoa	Arcella crenulata	S17	09H	B	2	Delfincocha	2021
Amoebozoa	Arcella intermedia	S17	09H	B	1	Delfincocha	2021
Amoebozoa	Arcella sp 1	S17	09H	B	0	Delfincocha	2021
Amoebozoa	Arcella sp 2	S17	09H	B	0	Delfincocha	2021
Amoebozoa	Arcella sp 3	S17	09H	B	0	Delfincocha	2021
Amoebozoa	Arcella sp 5	S17	09H	B	1	Delfincocha	2021
Amoebozoa	Arcella sp 6	S17	09H	B	1	Delfincocha	2021
Amoebozoa	Arcella sp 7	S17	09H	B	0	Delfincocha	2021
Amoebozoa	Arcella conica	S17	09H	B	1	Delfincocha	2021
Amoebozoa	Euglypha	S17	09H	B	1	Delfincocha	2021
Amoebozoa	Arcella ganfaldi	S17	09H	B	0	Delfincocha	2021
Rotifera	rotifero 4	S17	09H	B	0	Delfincocha	2021
Rotifera	rotifero	S17	09H	B	0	Delfincocha	2021
Cladocera	Nauplio de copepodo	S17	09H	B	1	Delfincocha	2021
Rotifera	Lecane leontina	S17	09H	B	0	Delfincocha	2021
Amoebozoa	Arcella hemisphaerica sp 26	S17	09H	B	1	Delfincocha	2021
Amoebozoa	Arcella sp.	S17	09H	B	1	Delfincocha	2021
Amoebozoa	Arcella dentada	S17	09H	B	0	Delfincocha	2021
Rotifera	Bdelloid 1	S17	09H	B	0	Delfincocha	2021
Rotifera	Bdelloid 2	S17	09H	B	0	Delfincocha	2021
Rotifera	Dipleuchlanis ?	S17	09H	B	0	Delfincocha	2021
Rotifera	Dipleuchlanis n.i	S17	09H	B	0	Delfincocha	2021
Amoebozoa	Arcella interemisferica	S17	09H	B	0	Delfincocha	2021
Amoebozoa	Arcella cf gibbosa	S17	09H	B	7	Delfincocha	2021	HW
Cladocera	Diaphanosoma sp1	S18	09H	C	1	Delfincocha	2021
Cladocera	Macrothrix sp2	S18	09H	C	0	Delfincocha	2021
Cladocera	Macrothrix sp3	S18	09H	C	1	Delfincocha	2021
Cladocera	Ilyocryptus (spinifer)	S18	09H	C	0	Delfincocha	2021
Rotifera	Filinia longiseta	S18	09H	C	0	Delfincocha	2021
Rotifera	Asplanchna sp1	S18	09H	C	0	Delfincocha	2021
Rotifera	Asplanchna sp2	S18	09H	C	2	Delfincocha	2021
Rotifera	Asplanchna sp3	S18	09H	C	16	Delfincocha	2021
Rotifera	Polyarthra cf dolichoptera	S18	09H	C	0	Delfincocha	2021
Rotifera	Brachionus zahniseri	S18	09H	C	0	Delfincocha	2021
Rotifera	Keratella cf cochlearis	S18	09H	C	0	Delfincocha	2021
Rotifera	Lecane bulla	S18	09H	C	1	Delfincocha	2021
Rotifera	Lecane tenuisera	S18	09H	C	0	Delfincocha	2021
Rotifera	Lecane sp1	S18	09H	C	0	Delfincocha	2021
Rotifera	Displeuchlanis propulata	S18	09H	C	0	Delfincocha	2021
Amoebozoa	Arcella cf gibbosa	S18	09H	C	5	Delfincocha	2021	HW
Amoebozoa	Arcella crenulata	S18	09H	C	0	Delfincocha	2021
Amoebozoa	Arcella intermedia	S18	09H	C	0	Delfincocha	2021
Amoebozoa	Arcella sp 1	S18	09H	C	0	Delfincocha	2021
Amoebozoa	Arcella sp 2	S18	09H	C	0	Delfincocha	2021
Amoebozoa	Arcella sp 3	S18	09H	C	0	Delfincocha	2021
Amoebozoa	Arcella sp 5	S18	09H	C	0	Delfincocha	2021
Amoebozoa	Arcella sp 6	S18	09H	C	0	Delfincocha	2021
Amoebozoa	Arcella sp 7	S18	09H	C	0	Delfincocha	2021
Amoebozoa	Arcella conica	S18	09H	C	0	Delfincocha	2021
Amoebozoa	Euglypha	S18	09H	C	1	Delfincocha	2021
Amoebozoa	Arcella ganfaldi	S18	09H	C	0	Delfincocha	2021
Rotifera	rotifero 4	S18	09H	C	0	Delfincocha	2021
Rotifera	rotifero	S18	09H	C	1	Delfincocha	2021
Cladocera	Nauplio de copepodo	S18	09H	C	0	Delfincocha	2021
Rotifera	Lecane leontina	S18	09H	C	1	Delfincocha	2021
Amoebozoa	Arcella hemisphaerica sp 26	S18	09H	C	0	Delfincocha	2021
Amoebozoa	Arcella sp.	S18	09H	C	0	Delfincocha	2021
Amoebozoa	Arcella dentada	S18	09H	C	0	Delfincocha	2021
Rotifera	Bdelloid 1	S18	09H	C	0	Delfincocha	2021
Rotifera	Bdelloid 2	S18	09H	C	0	Delfincocha	2021
Rotifera	Dipleuchlanis ?	S18	09H	C	0	Delfincocha	2021
Rotifera	Dipleuchlanis n.i	S18	09H	C	0	Delfincocha	2021
Amoebozoa	Arcella interemisferica	S18	09H	C	0	Delfincocha	2021
Amoebozoa	Arcella cf gibbosa	S18	09H	C	3	Delfincocha	2021	HW
Cladocera	Diaphanosoma sp1	S19	12H	A	0	Delfincocha	2021
Cladocera	Macrothrix sp2	S19	12H	A	0	Delfincocha	2021
Cladocera	Macrothrix sp3	S19	12H	A	0	Delfincocha	2021
Cladocera	Ilyocryptus (spinifer)	S19	12H	A	1	Delfincocha	2021
Rotifera	Filinia longiseta	S19	12H	A	5	Delfincocha	2021
Rotifera	Asplanchna sp1	S19	12H	A	0	Delfincocha	2021
Rotifera	Asplanchna sp2	S19	12H	A	2	Delfincocha	2021
Rotifera	Asplanchna sp3	S19	12H	A	11	Delfincocha	2021
Rotifera	Polyarthra cf dolichoptera	S19	12H	A	2	Delfincocha	2021
Rotifera	Brachionus zahniseri	S19	12H	A	2	Delfincocha	2021
Rotifera	Keratella cf cochlearis	S19	12H	A	0	Delfincocha	2021
Rotifera	Lecane bulla	S19	12H	A	2	Delfincocha	2021
Rotifera	Lecane tenuisera	S19	12H	A	3	Delfincocha	2021
Rotifera	Lecane sp1	S19	12H	A	3	Delfincocha	2021
Rotifera	Displeuchlanis propulata	S19	12H	A	1	Delfincocha	2021
Amoebozoa	Arcella cf gibbosa	S19	12H	A	2	Delfincocha	2021	HW
Amoebozoa	Arcella crenulata	S19	12H	A	2	Delfincocha	2021
Amoebozoa	Arcella intermedia	S19	12H	A	0	Delfincocha	2021
Amoebozoa	Arcella sp 1	S19	12H	A	0	Delfincocha	2021
Amoebozoa	Arcella sp 2	S19	12H	A	0	Delfincocha	2021
Amoebozoa	Arcella sp 3	S19	12H	A	0	Delfincocha	2021
Amoebozoa	Arcella sp 5	S19	12H	A	0	Delfincocha	2021
Amoebozoa	Arcella sp 6	S19	12H	A	0	Delfincocha	2021
Amoebozoa	Arcella sp 7	S19	12H	A	0	Delfincocha	2021
Amoebozoa	Arcella conica	S19	12H	A	0	Delfincocha	2021
Amoebozoa	Euglypha	S19	12H	A	1	Delfincocha	2021
Amoebozoa	Arcella ganfaldi	S19	12H	A	0	Delfincocha	2021
Rotifera	rotifero 4	S19	12H	A	0	Delfincocha	2021
Rotifera	rotifero	S19	12H	A	0	Delfincocha	2021
Copepoda	Nauplio de copepodo	S19	12H	A	0	Delfincocha	2021
Rotifera	Lecane leontina	S19	12H	A	0	Delfincocha	2021
Amoebozoa	Arcella hemisphaerica sp 26	S19	12H	A	0	Delfincocha	2021
Amoebozoa	Arcella sp.	S19	12H	A	1	Delfincocha	2021
Amoebozoa	Arcella dentada	S19	12H	A	0	Delfincocha	2021
Rotifera	Bdelloid 1	S19	12H	A	0	Delfincocha	2021
Rotifera	Bdelloid 2	S19	12H	A	0	Delfincocha	2021
Rotifera	Dipleuchlanis ?	S19	12H	A	0	Delfincocha	2021
Rotifera	Dipleuchlanis n.i	S19	12H	A	0	Delfincocha	2021
Amoebozoa	Arcella interemisferica	S19	12H	A	2	Delfincocha	2021
Amoebozoa	Arcella cf gibbosa	S19	12H	A	8	Delfincocha	2021	HW
Cladocera	Diaphanosoma sp1	S20	12H	B	0	Delfincocha	2021
Cladocera	Macrothrix sp2	S20	12H	B	0	Delfincocha	2021
Cladocera	Macrothrix sp3	S20	12H	B	1	Delfincocha	2021
Cladocera	Ilyocryptus (spinifer)	S20	12H	B	0	Delfincocha	2021
Rotifera	Filinia longiseta	S20	12H	B	1	Delfincocha	2021
Rotifera	Asplanchna sp1	S20	12H	B	0	Delfincocha	2021
Rotifera	Asplanchna sp2	S20	12H	B	0	Delfincocha	2021
Rotifera	Asplanchna sp3	S20	12H	B	8	Delfincocha	2021
Rotifera	Polyarthra cf dolichoptera	S20	12H	B	0	Delfincocha	2021
Rotifera	Brachionus zahniseri	S20	12H	B	0	Delfincocha	2021
Rotifera	Keratella cf cochlearis	S20	12H	B	0	Delfincocha	2021
Rotifera	Lecane bulla	S20	12H	B	2	Delfincocha	2021
Rotifera	Lecane tenuisera	S20	12H	B	1	Delfincocha	2021
Rotifera	Lecane sp1	S20	12H	B	3	Delfincocha	2021
Rotifera	Displeuchlanis propulata	S20	12H	B	0	Delfincocha	2021
Amoebozoa	Arcella cf gibbosa	S20	12H	B	14	Delfincocha	2021	HW
Amoebozoa	Arcella crenulata	S20	12H	B	0	Delfincocha	2021
Amoebozoa	Arcella intermedia	S20	12H	B	0	Delfincocha	2021
Amoebozoa	Arcella sp 1	S20	12H	B	0	Delfincocha	2021
Amoebozoa	Arcella sp 2	S20	12H	B	2	Delfincocha	2021
Amoebozoa	Arcella sp 3	S20	12H	B	0	Delfincocha	2021
Amoebozoa	Arcella sp 5	S20	12H	B	0	Delfincocha	2021
Amoebozoa	Arcella sp 6	S20	12H	B	2	Delfincocha	2021
Amoebozoa	Arcella sp 7	S20	12H	B	0	Delfincocha	2021
Amoebozoa	Arcella conica	S20	12H	B	2	Delfincocha	2021
Amoebozoa	Euglypha	S20	12H	B	1	Delfincocha	2021
Amoebozoa	Arcella ganfaldi	S20	12H	B	0	Delfincocha	2021
Rotifera	rotifero 4	S20	12H	B	0	Delfincocha	2021
Rotifera	rotifero	S20	12H	B	1	Delfincocha	2021
Cladocera	Nauplio de copepodo	S20	12H	B	0	Delfincocha	2021
Rotifera	Lecane leontina	S20	12H	B	0	Delfincocha	2021
Amoebozoa	Arcella hemisphaerica sp 26	S20	12H	B	0	Delfincocha	2021
Amoebozoa	Arcella sp.	S20	12H	B	0	Delfincocha	2021
Amoebozoa	Arcella dentada	S20	12H	B	0	Delfincocha	2021
Rotifera	Bdelloid 1	S20	12H	B	0	Delfincocha	2021
Rotifera	Bdelloid 2	S20	12H	B	0	Delfincocha	2021
Rotifera	Dipleuchlanis ?	S20	12H	B	1	Delfincocha	2021
Rotifera	Dipleuchlanis n.i	S20	12H	B	0	Delfincocha	2021
Amoebozoa	Arcella interemisferica	S20	12H	B	0	Delfincocha	2021
Amoebozoa	Arcella cf gibbosa	S20	12H	B	7	Delfincocha	2021	HW
Cladocera	Diaphanosoma sp1	S21	12H	C	0	Delfincocha	2021
Cladocera	Macrothrix sp2	S21	12H	C	0	Delfincocha	2021
Cladocera	Macrothrix sp3	S21	12H	C	1	Delfincocha	2021
Cladocera	Ilyocryptus (spinifer)	S21	12H	C	1	Delfincocha	2021
Rotifera	Filinia longiseta	S21	12H	C	0	Delfincocha	2021
Rotifera	Asplanchna sp1	S21	12H	C	0	Delfincocha	2021
Rotifera	Asplanchna sp2	S21	12H	C	0	Delfincocha	2021
Rotifera	Asplanchna sp3	S21	12H	C	17	Delfincocha	2021
Rotifera	Polyarthra cf dolichoptera	S21	12H	C	0	Delfincocha	2021
Rotifera	Brachionus zahniseri	S21	12H	C	1	Delfincocha	2021
Rotifera	Keratella cf cochlearis	S21	12H	C	0	Delfincocha	2021
Rotifera	Lecane bulla	S21	12H	C	0	Delfincocha	2021
Rotifera	Lecane tenuisera	S21	12H	C	3	Delfincocha	2021
Rotifera	Lecane sp1	S21	12H	C	1	Delfincocha	2021
Rotifera	Displeuchlanis propulata	S21	12H	C	0	Delfincocha	2021
Amoebozoa	Arcella cf gibbosa	S21	12H	C	6	Delfincocha	2021	HW
Amoebozoa	Arcella crenulata	S21	12H	C	0	Delfincocha	2021
Amoebozoa	Arcella intermedia	S21	12H	C	1	Delfincocha	2021
Amoebozoa	Arcella sp 1	S21	12H	C	0	Delfincocha	2021
Amoebozoa	Arcella sp 2	S21	12H	C	0	Delfincocha	2021
Amoebozoa	Arcella sp 3	S21	12H	C	0	Delfincocha	2021
Amoebozoa	Arcella sp 5	S21	12H	C	0	Delfincocha	2021
Amoebozoa	Arcella sp 6	S21	12H	C	3	Delfincocha	2021
Amoebozoa	Arcella sp 7	S21	12H	C	0	Delfincocha	2021
Amoebozoa	Arcella conica	S21	12H	C	1	Delfincocha	2021
Amoebozoa	Euglypha	S21	12H	C	0	Delfincocha	2021
Amoebozoa	Arcella ganfaldi	S21	12H	C	0	Delfincocha	2021
Rotifera	rotifero 4	S21	12H	C	0	Delfincocha	2021
Rotifera	rotifero	S21	12H	C	4	Delfincocha	2021
Copepoda	Nauplio de copepodo	S21	12H	C	0	Delfincocha	2021
Rotifera	Lecane leontina	S21	12H	C	0	Delfincocha	2021
Amoebozoa	Arcella hemisphaerica sp 26	S21	12H	C	0	Delfincocha	2021
Amoebozoa	Arcella sp.	S21	12H	C	1	Delfincocha	2021
Amoebozoa	Arcella dentada	S21	12H	C	0	Delfincocha	2021
Rotifera	Bdelloid 1	S21	12H	C	3	Delfincocha	2021
Rotifera	Bdelloid 2	S21	12H	C	1	Delfincocha	2021
Rotifera	Dipleuchlanis ?	S21	12H	C	1	Delfincocha	2021
Rotifera	Dipleuchlanis n.i	S21	12H	C	0	Delfincocha	2021
Amoebozoa	Arcella interemisferica	S21	12H	C	0	Delfincocha	2021
Amoebozoa	Arcella cf gibbosa	S21	12H	C	3	Delfincocha	2021	HW
Cladocera	Diaphanosoma sp1	S22	15H	A	0	Delfincocha	2021
Cladocera	Macrothrix sp2	S22	15H	A	0	Delfincocha	2021
Cladocera	Macrothrix sp3	S22	15H	A	0	Delfincocha	2021
Cladocera	Ilyocryptus (spinifer)	S22	15H	A	0	Delfincocha	2021
Rotifera	Filinia longiseta	S22	15H	A	0	Delfincocha	2021
Rotifera	Asplanchna sp1	S22	15H	A	5	Delfincocha	2021
Rotifera	Asplanchna sp2	S22	15H	A	0	Delfincocha	2021
Rotifera	Asplanchna sp3	S22	15H	A	11	Delfincocha	2021
Rotifera	Polyarthra cf dolichoptera	S22	15H	A	3	Delfincocha	2021
Rotifera	Brachionus zahniseri	S22	15H	A	0	Delfincocha	2021
Rotifera	Keratella cf cochlearis	S22	15H	A	2	Delfincocha	2021
Rotifera	Lecane bulla	S22	15H	A	1	Delfincocha	2021
Rotifera	Lecane tenuisera	S22	15H	A	0	Delfincocha	2021
Rotifera	Lecane sp1	S22	15H	A	1	Delfincocha	2021
Rotifera	Displeuchlanis propulata	S22	15H	A	0	Delfincocha	2021
Amoebozoa	Arcella cf gibbosa	S22	15H	A	15	Delfincocha	2021	HW
Amoebozoa	Arcella crenulata	S22	15H	A	0	Delfincocha	2021
Amoebozoa	Arcella intermedia	S22	15H	A	0	Delfincocha	2021
Amoebozoa	Arcella sp 1	S22	15H	A	0	Delfincocha	2021
Amoebozoa	Arcella sp 2	S22	15H	A	0	Delfincocha	2021
Amoebozoa	Arcella sp 3	S22	15H	A	0	Delfincocha	2021
Amoebozoa	Arcella sp 5	S22	15H	A	0	Delfincocha	2021
Amoebozoa	Arcella sp 6	S22	15H	A	7	Delfincocha	2021
Amoebozoa	Arcella sp 7	S22	15H	A	0	Delfincocha	2021
Amoebozoa	Arcella conica	S22	15H	A	0	Delfincocha	2021
Amoebozoa	Euglypha	S22	15H	A	0	Delfincocha	2021
Amoebozoa	Arcella ganfaldi	S22	15H	A	0	Delfincocha	2021
Rotifera	rotifero 4	S22	15H	A	0	Delfincocha	2021
Rotifera	rotifero	S22	15H	A	0	Delfincocha	2021
Copepoda	Nauplio de copepodo	S22	15H	A	0	Delfincocha	2021
Rotifera	Lecane leontina	S22	15H	A	0	Delfincocha	2021
Amoebozoa	Arcella hemisphaerica sp 26	S22	15H	A	0	Delfincocha	2021
Amoebozoa	Arcella sp.	S22	15H	A	0	Delfincocha	2021
Amoebozoa	Arcella dentada	S22	15H	A	0	Delfincocha	2021
Rotifera	Bdelloid 1	S22	15H	A	2	Delfincocha	2021
Rotifera	Bdelloid 2	S22	15H	A	1	Delfincocha	2021
Rotifera	Dipleuchlanis ?	S22	15H	A	0	Delfincocha	2021
Rotifera	Dipleuchlanis n.i	S22	15H	A	0	Delfincocha	2021
Amoebozoa	Arcella interemisferica	S22	15H	A	1	Delfincocha	2021
Amoebozoa	Arcella cf gibbosa	S22	15H	A	4	Delfincocha	2021	HW
Cladocera	Diaphanosoma sp1	S23	15H	B	0	Delfincocha	2021
Cladocera	Macrothrix sp2	S23	15H	B	0	Delfincocha	2021
Cladocera	Macrothrix sp3	S23	15H	B	1	Delfincocha	2021
Cladocera	Ilyocryptus (spinifer)	S23	15H	B	0	Delfincocha	2021
Rotifera	Filinia longiseta	S23	15H	B	1	Delfincocha	2021
Rotifera	Asplanchna sp1	S23	15H	B	1	Delfincocha	2021
Rotifera	Asplanchna sp2	S23	15H	B	0	Delfincocha	2021
Rotifera	Asplanchna sp3	S23	15H	B	14	Delfincocha	2021
Rotifera	Polyarthra cf dolichoptera	S23	15H	B	0	Delfincocha	2021
Rotifera	Brachionus zahniseri	S23	15H	B	0	Delfincocha	2021
Rotifera	Keratella cf cochlearis	S23	15H	B	1	Delfincocha	2021
Rotifera	Lecane bulla	S23	15H	B	1	Delfincocha	2021
Rotifera	Lecane tenuisera	S23	15H	B	0	Delfincocha	2021
Rotifera	Lecane sp1	S23	15H	B	0	Delfincocha	2021
Rotifera	Displeuchlanis propulata	S23	15H	B	0	Delfincocha	2021
Amoebozoa	Arcella cf gibbosa	S23	15H	B	11	Delfincocha	2021	HW
Amoebozoa	Arcella crenulata	S23	15H	B	2	Delfincocha	2021
Amoebozoa	Arcella intermedia	S23	15H	B	0	Delfincocha	2021
Amoebozoa	Arcella sp 1	S23	15H	B	0	Delfincocha	2021
Amoebozoa	Arcella sp 2	S23	15H	B	0	Delfincocha	2021
Amoebozoa	Arcella sp 3	S23	15H	B	0	Delfincocha	2021
Amoebozoa	Arcella sp 5	S23	15H	B	0	Delfincocha	2021
Amoebozoa	Arcella sp 6	S23	15H	B	0	Delfincocha	2021
Amoebozoa	Arcella sp 7	S23	15H	B	0	Delfincocha	2021
Amoebozoa	Arcella conica	S23	15H	B	1	Delfincocha	2021
Amoebozoa	Euglypha	S23	15H	B	0	Delfincocha	2021
Amoebozoa	Arcella ganfaldi	S23	15H	B	0	Delfincocha	2021
Rotifera	rotifero 4	S23	15H	B	0	Delfincocha	2021
Rotifera	rotifero	S23	15H	B	2	Delfincocha	2021
Copepoda	Nauplio de copepodo	S23	15H	B	0	Delfincocha	2021
Rotifera	Lecane leontina	S23	15H	B	1	Delfincocha	2021
Amoebozoa	Arcella hemisphaerica sp 26	S23	15H	B	0	Delfincocha	2021
Amoebozoa	Arcella sp.	S23	15H	B	2	Delfincocha	2021
Amoebozoa	Arcella dentada	S23	15H	B	0	Delfincocha	2021
Rotifera	Bdelloid 1	S23	15H	B	0	Delfincocha	2021
Rotifera	Bdelloid 2	S23	15H	B	0	Delfincocha	2021
Rotifera	Dipleuchlanis ?	S23	15H	B	0	Delfincocha	2021
Rotifera	Dipleuchlanis n.i	S23	15H	B	0	Delfincocha	2021
Amoebozoa	Arcella interemisferica	S23	15H	B	0	Delfincocha	2021
Amoebozoa	Arcella cf gibbosa	S23	15H	B	2	Delfincocha	2021	HW
Cladocera	Diaphanosoma sp1	S24	15H	C	0	Delfincocha	2021
Cladocera	Macrothrix sp2	S24	15H	C	0	Delfincocha	2021
Cladocera	Macrothrix sp3	S24	15H	C	0	Delfincocha	2021
Cladocera	Ilyocryptus (spinifer)	S24	15H	C	0	Delfincocha	2021
Rotifera	Filinia longiseta	S24	15H	C	0	Delfincocha	2021
Rotifera	Asplanchna sp1	S24	15H	C	0	Delfincocha	2021
Rotifera	Asplanchna sp2	S24	15H	C	1	Delfincocha	2021
Rotifera	Asplanchna sp3	S24	15H	C	7	Delfincocha	2021
Rotifera	Polyarthra cf dolichoptera	S24	15H	C	0	Delfincocha	2021
Rotifera	Brachionus zahniseri	S24	15H	C	0	Delfincocha	2021
Rotifera	Keratella cf cochlearis	S24	15H	C	2	Delfincocha	2021
Rotifera	Lecane bulla	S24	15H	C	0	Delfincocha	2021
Rotifera	Lecane tenuisera	S24	15H	C	1	Delfincocha	2021
Rotifera	Lecane sp1	S24	15H	C	3	Delfincocha	2021
Rotifera	Displeuchlanis propulata	S24	15H	C	0	Delfincocha	2021
Amoebozoa	Arcella cf gibbosa	S24	15H	C	5	Delfincocha	2021	HW
Amoebozoa	Arcella crenulata	S24	15H	C	1	Delfincocha	2021
Amoebozoa	Arcella intermedia	S24	15H	C	0	Delfincocha	2021
Amoebozoa	Arcella sp 1	S24	15H	C	0	Delfincocha	2021
Amoebozoa	Arcella sp 2	S24	15H	C	0	Delfincocha	2021
Amoebozoa	Arcella sp 3	S24	15H	C	0	Delfincocha	2021
Amoebozoa	Arcella sp 5	S24	15H	C	0	Delfincocha	2021
Amoebozoa	Arcella sp 6	S24	15H	C	0	Delfincocha	2021
Amoebozoa	Arcella sp 7	S24	15H	C	0	Delfincocha	2021
Amoebozoa	Arcella conica	S24	15H	C	1	Delfincocha	2021
Amoebozoa	Euglypha	S24	15H	C	0	Delfincocha	2021
Amoebozoa	Arcella ganfaldi	S24	15H	C	0	Delfincocha	2021
Rotifera	rotifero 4	S24	15H	C	0	Delfincocha	2021
Rotifera	rotifero	S24	15H	C	1	Delfincocha	2021
Copepoda	Nauplio de copepodo	S24	15H	C	0	Delfincocha	2021
Rotifera	Lecane leontina	S24	15H	C	1	Delfincocha	2021
Amoebozoa	Arcella hemisphaerica sp 26	S24	15H	C	0	Delfincocha	2021
Amoebozoa	Arcella sp.	S24	15H	C	0	Delfincocha	2021
Amoebozoa	Arcella dentada	S24	15H	C	0	Delfincocha	2021
Rotifera	Bdelloid 1	S24	15H	C	0	Delfincocha	2021
Rotifera	Bdelloid 2	S24	15H	C	0	Delfincocha	2021
Rotifera	Dipleuchlanis ?	S24	15H	C	1	Delfincocha	2021
Rotifera	Dipleuchlanis n.i	S24	15H	C	0	Delfincocha	2021
Amoebozoa	Arcella interemisferica	S24	15H	C	0	Delfincocha	2021
Amoebozoa	Arcella cf gibbosa	S24	15H	C	0	Delfincocha	2021	HW
Cladocera	Bosminopsis deitersi	S25	18H	A	3	Grande	2021
Cladocera	Bosminopsis sp	S25	18H	A	3	Grande	2021
Cladocera	Diaphanosoma sp1	S25	18H	A	65	Grande	2021
Cladocera	Bosmina longirostris	S25	18H	A	7	Grande	2021
Rotifera	Filinia longiseta	S25	18H	A	3	Grande	2021
Rotifera	Testudinella sp	S25	18H	A	0	Grande	2021
Rotifera	Testudinella cf. Ohlei	S25	18H	A	0	Grande	2021
Rotifera	Asplanchna sp1	S25	18H	A	5	Grande	2021
Rotifera	Asplanchna sp2	S25	18H	A	2	Grande	2021
Rotifera	Asplanchna sp3	S25	18H	A	0	Grande	2021
Rotifera	Macrochaetus sp	S25	18H	A	0	Grande	2021
Rotifera	Trichocerca sp1	S25	18H	A	0	Grande	2021
Rotifera	Trichocerca sp2	S25	18H	A	0	Grande	2021
Rotifera	Polyarthra cf dolichoptera	S25	18H	A	47	Grande	2021
Rotifera	Brachionus zahniseri	S25	18H	A	174	Grande	2021
Rotifera	Keratella cf cochlearis	S25	18H	A	116	Grande	2021
Rotifera	Hexarthra sp	S25	18H	A	155	Grande	2021
Rotifera	Turbellario	S25	18H	A	3	Grande	2021
Rotifera	Lecane bulla	S25	18H	A	0	Grande	2021
Rotifera	Lecane cf tenuiseta	S25	18H	A	0	Grande	2021
Rotifera	Lecane cf leontina	S25	18H	A	0	Grande	2021
Rotifera	Dipleuchlanis cf propatula	S25	18H	A	0	Grande	2021
Copepoda	Naupli	S25	18H	A	14	Grande	2021
Copepoda	Copepoda Calanoidea sp1	S25	18H	A	0	Grande	2021
Copepoda	Copepoda Calanoidea sp2	S25	18H	A	1	Grande	2021
Copepoda	Copepoda Calanoidea sp3	S25	18H	A	0	Grande	2021
Copepoda	Copepoda Cyclopoidea sp1	S25	18H	A	1	Grande	2021
Copepoda	Copepoda Cyclopoidea sp2	S25	18H	A	2	Grande	2021
Copepoda	Copepoda Cyclopoidea sp3	S25	18H	A	2	Grande	2021
Copepoda	Copepoda	S25	18H	A	0	Grande	2021
Amoebozoa	Arcella cf gibbosa	S25	18H	A	1	Grande	2021	HW
Amoebozoa	Arcella crenulata	S25	18H	A	2	Grande	2021
Amoebozoa	Arcella megastoma	S25	18H	A	0	Grande	2021
Amoebozoa	Arcella cf megastoma	S25	18H	A	0	Grande	2021
Amoebozoa	Arcella cf conica	S25	18H	A	0	Grande	2021
Amoebozoa	Arcella gandalfi	S25	18H	A	0	Grande	2021
Amoebozoa	Arcella intermedia	S25	18H	A	0	Grande	2021
Amoebozoa	Arcella sp 4	S25	18H	A	0	Grande	2021
Amoebozoa	Arcella sp 6	S25	18H	A	0	Grande	2021
Amoebozoa	Euglypha sp	S25	18H	A	0	Grande	2021
Cladocera	Bosminopsis deitersi	S26	18H	B	2	Grande	2021
Cladocera	Bosminopsis sp	S26	18H	B	2	Grande	2021
Cladocera	Diaphanosoma sp1	S26	18H	B	13	Grande	2021
Cladocera	Bosmina longirostris	S26	18H	B	4	Grande	2021
Rotifera	Filinia longiseta	S26	18H	B	575	Grande	2021
Rotifera	Testudinella sp	S26	18H	B	0	Grande	2021
Rotifera	Testudinella cf. Ohlei	S26	18H	B	0	Grande	2021
Rotifera	Asplanchna sp1	S26	18H	B	5	Grande	2021
Rotifera	Asplanchna sp2	S26	18H	B	0	Grande	2021
Rotifera	Asplanchna sp3	S26	18H	B	0	Grande	2021
Rotifera	Macrochaetus sp	S26	18H	B	0	Grande	2021
Rotifera	Trichocerca sp1	S26	18H	B	0	Grande	2021
Rotifera	Trichocerca sp2	S26	18H	B	3	Grande	2021
Rotifera	Polyarthra cf dolichoptera	S26	18H	B	57	Grande	2021
Rotifera	Brachionus zahniseri	S26	18H	B	143	Grande	2021
Rotifera	Keratella cf cochlearis	S26	18H	B	148	Grande	2021
Rotifera	Hexarthra sp	S26	18H	B	88	Grande	2021
Rotifera	Turbellario	S26	18H	B	0	Grande	2021
Rotifera	Lecane bulla	S26	18H	B	1	Grande	2021
Rotifera	Lecane cf tenuiseta	S26	18H	B	0	Grande	2021
Rotifera	Lecane cf leontina	S26	18H	B	0	Grande	2021
Rotifera	Dipleuchlanis cf propatula	S26	18H	B	0	Grande	2021
Copepoda	Naupli	S26	18H	B	8	Grande	2021
Copepoda	Copepoda Calanoidea sp1	S26	18H	B	0	Grande	2021
Copepoda	Copepoda Calanoidea sp2	S26	18H	B	0	Grande	2021
Copepoda	Copepoda Calanoidea sp3	S26	18H	B	5	Grande	2021
Copepoda	Copepoda Cyclopoidea sp1	S26	18H	B	1	Grande	2021
Copepoda	Copepoda Cyclopoidea sp2	S26	18H	B	0	Grande	2021
Copepoda	Copepoda Cyclopoidea sp3	S26	18H	B	0	Grande	2021
Copepoda	Copepoda	S26	18H	B	0	Grande	2021
Amoebozoa	Arcella cf gibbosa	S26	18H	B	0	Grande	2021	HW
Amoebozoa	Arcella crenulata	S26	18H	B	0	Grande	2021
Amoebozoa	Arcella megastoma	S26	18H	B	0	Grande	2021
Amoebozoa	Arcella cf megastoma	S26	18H	B	0	Grande	2021
Amoebozoa	Arcella cf conica	S26	18H	B	0	Grande	2021
Amoebozoa	Arcella gandalfi	S26	18H	B	0	Grande	2021
Amoebozoa	Arcella intermedia	S26	18H	B	0	Grande	2021
Amoebozoa	Arcella sp 4	S26	18H	B	0	Grande	2021
Amoebozoa	Arcella sp 6	S26	18H	B	0	Grande	2021
Amoebozoa	Euglypha sp	S26	18H	B	0	Grande	2021
Cladocera	Bosminopsis deitersi	S27	18H	C	0	Grande	2021
Cladocera	Bosminopsis sp	S27	18H	C	0	Grande	2021
Cladocera	Diaphanosoma sp1	S27	18H	C	2	Grande	2021
Cladocera	Bosmina longirostris	S27	18H	C	0	Grande	2021
Rotifera	Filinia longiseta	S27	18H	C	201	Grande	2021
Rotifera	Testudinella sp	S27	18H	C	0	Grande	2021
Rotifera	Testudinella cf. Ohlei	S27	18H	C	0	Grande	2021
Rotifera	Asplanchna sp1	S27	18H	C	3	Grande	2021
Rotifera	Asplanchna sp2	S27	18H	C	0	Grande	2021
Rotifera	Asplanchna sp3	S27	18H	C	0	Grande	2021
Rotifera	Macrochaetus sp	S27	18H	C	0	Grande	2021
Rotifera	Trichocerca sp1	S27	18H	C	0	Grande	2021
Rotifera	Trichocerca sp2	S27	18H	C	2	Grande	2021
Rotifera	Polyarthra cf dolichoptera	S27	18H	C	20	Grande	2021
Rotifera	Brachionus zahniseri	S27	18H	C	41	Grande	2021
Rotifera	Keratella cf cochlearis	S27	18H	C	30	Grande	2021
Rotifera	Hexarthra sp	S27	18H	C	21	Grande	2021
Rotifera	Turbellario	S27	18H	C	0	Grande	2021
Rotifera	Lecane bulla	S27	18H	C	0	Grande	2021
Rotifera	Lecane cf tenuiseta	S27	18H	C	1	Grande	2021
Rotifera	Lecane cf leontina	S27	18H	C	0	Grande	2021
Rotifera	Dipleuchlanis cf propatula	S27	18H	C	0	Grande	2021
Copepoda	Naupli	S27	18H	C	2	Grande	2021
Copepoda	Copepoda Calanoidea sp1	S27	18H	C	0	Grande	2021
Copepoda	Copepoda Calanoidea sp2	S27	18H	C	0	Grande	2021
Copepoda	Copepoda Calanoidea sp3	S27	18H	C	1	Grande	2021
Copepoda	Copepoda Cyclopoidea sp1	S27	18H	C	1	Grande	2021
Copepoda	Copepoda Cyclopoidea sp2	S27	18H	C	0	Grande	2021
Copepoda	Copepoda Cyclopoidea sp3	S27	18H	C	0	Grande	2021
Copepoda	Copepoda	S27	18H	C	0	Grande	2021
Amoebozoa	Arcella cf gibbosa	S27	18H	C	0	Grande	2021	HW
Amoebozoa	Arcella crenulata	S27	18H	C	0	Grande	2021
Amoebozoa	Arcella megastoma	S27	18H	C	0	Grande	2021
Amoebozoa	Arcella cf megastoma	S27	18H	C	0	Grande	2021
Amoebozoa	Arcella cf conica	S27	18H	C	0	Grande	2021
Amoebozoa	Arcella gandalfi	S27	18H	C	0	Grande	2021
Amoebozoa	Arcella intermedia	S27	18H	C	0	Grande	2021
Amoebozoa	Arcella sp 4	S27	18H	C	0	Grande	2021
Amoebozoa	Arcella sp 6	S27	18H	C	0	Grande	2021
Amoebozoa	Euglypha sp	S27	18H	C	0	Grande	2021
Cladocera	Bosminopsis deitersi	S28	21H	A	12	Grande	2021
Cladocera	Bosminopsis sp	S28	21H	A	18	Grande	2021
Cladocera	Diaphanosoma sp1	S28	21H	A	22	Grande	2021
Cladocera	Bosmina longirostris	S28	21H	A	2	Grande	2021
Rotifera	Filinia longiseta	S28	21H	A	4	Grande	2021
Rotifera	Testudinella sp	S28	21H	A	0	Grande	2021
Rotifera	Testudinella cf. Ohlei	S28	21H	A	0	Grande	2021
Rotifera	Asplanchna sp1	S28	21H	A	16	Grande	2021
Rotifera	Asplanchna sp2	S28	21H	A	0	Grande	2021
Rotifera	Asplanchna sp3	S28	21H	A	0	Grande	2021
Rotifera	Macrochaetus sp	S28	21H	A	0	Grande	2021
Rotifera	Trichocerca sp1	S28	21H	A	0	Grande	2021
Rotifera	Trichocerca sp2	S28	21H	A	0	Grande	2021
Rotifera	Polyarthra cf dolichoptera	S28	21H	A	11	Grande	2021
Rotifera	Brachionus zahniseri	S28	21H	A	79	Grande	2021
Rotifera	Keratella cf cochlearis	S28	21H	A	49	Grande	2021
Rotifera	Hexarthra sp	S28	21H	A	41	Grande	2021
Rotifera	Turbellario	S28	21H	A	0	Grande	2021
Rotifera	Lecane bulla	S28	21H	A	0	Grande	2021
Rotifera	Lecane cf tenuiseta	S28	21H	A	0	Grande	2021
Rotifera	Lecane cf leontina	S28	21H	A	0	Grande	2021
Rotifera	Dipleuchlanis cf propatula	S28	21H	A	0	Grande	2021
Copepoda	Naupli	S28	21H	A	10	Grande	2021
Copepoda	Copepoda Calanoidea sp1	S28	21H	A	0	Grande	2021
Copepoda	Copepoda Calanoidea sp2	S28	21H	A	1	Grande	2021
Copepoda	Copepoda Calanoidea sp3	S28	21H	A	0	Grande	2021
Copepoda	Copepoda Cyclopoidea sp1	S28	21H	A	0	Grande	2021
Copepoda	Copepoda Cyclopoidea sp2	S28	21H	A	0	Grande	2021
Copepoda	Copepoda Cyclopoidea sp3	S28	21H	A	0	Grande	2021
Copepoda	Copepoda	S28	21H	A	0	Grande	2021
Amoebozoa	Arcella cf gibbosa	S28	21H	A	0	Grande	2021	HW
Amoebozoa	Arcella crenulata	S28	21H	A	0	Grande	2021
Amoebozoa	Arcella megastoma	S28	21H	A	0	Grande	2021
Amoebozoa	Arcella cf megastoma	S28	21H	A	0	Grande	2021
Amoebozoa	Arcella cf conica	S28	21H	A	0	Grande	2021
Amoebozoa	Arcella gandalfi	S28	21H	A	0	Grande	2021
Amoebozoa	Arcella intermedia	S28	21H	A	0	Grande	2021
Amoebozoa	Arcella sp 4	S28	21H	A	0	Grande	2021
Amoebozoa	Arcella sp 6	S28	21H	A	0	Grande	2021
Amoebozoa	Euglypha sp	S28	21H	A	0	Grande	2021
Cladocera	Bosminopsis deitersi	S29	21H	B	3	Grande	2021
Cladocera	Bosminopsis sp	S29	21H	B	10	Grande	2021
Cladocera	Diaphanosoma sp1	S29	21H	B	1	Grande	2021
Cladocera	Bosmina longirostris	S29	21H	B	12	Grande	2021
Rotifera	Filinia longiseta	S29	21H	B	0	Grande	2021
Rotifera	Testudinella sp	S29	21H	B	0	Grande	2021
Rotifera	Testudinella cf. Ohlei	S29	21H	B	0	Grande	2021
Rotifera	Asplanchna sp1	S29	21H	B	20	Grande	2021
Rotifera	Asplanchna sp2	S29	21H	B	0	Grande	2021
Rotifera	Asplanchna sp3	S29	21H	B	0	Grande	2021
Rotifera	Macrochaetus sp	S29	21H	B	0	Grande	2021
Rotifera	Trichocerca sp1	S29	21H	B	0	Grande	2021
Rotifera	Trichocerca sp2	S29	21H	B	0	Grande	2021
Rotifera	Polyarthra cf dolichoptera	S29	21H	B	17	Grande	2021
Rotifera	Brachionus zahniseri	S29	21H	B	61	Grande	2021
Rotifera	Keratella cf cochlearis	S29	21H	B	18	Grande	2021
Rotifera	Hexarthra sp	S29	21H	B	30	Grande	2021
Rotifera	Turbellario	S29	21H	B	0	Grande	2021
Rotifera	Lecane bulla	S29	21H	B	0	Grande	2021
Rotifera	Lecane cf tenuiseta	S29	21H	B	0	Grande	2021
Rotifera	Lecane cf leontina	S29	21H	B	0	Grande	2021
Rotifera	Dipleuchlanis cf propatula	S29	21H	B	0	Grande	2021
Copepoda	Naupli	S29	21H	B	12	Grande	2021
Copepoda	Copepoda Calanoidea sp1	S29	21H	B	0	Grande	2021
Copepoda	Copepoda Calanoidea sp2	S29	21H	B	0	Grande	2021
Copepoda	Copepoda Calanoidea sp3	S29	21H	B	0	Grande	2021
Copepoda	Copepoda Cyclopoidea sp1	S29	21H	B	1	Grande	2021
Copepoda	Copepoda Cyclopoidea sp2	S29	21H	B	1	Grande	2021
Copepoda	Copepoda Cyclopoidea sp3	S29	21H	B	0	Grande	2021
Copepoda	Copepoda	S29	21H	B	0	Grande	2021
Amoebozoa	Arcella cf gibbosa	S29	21H	B	0	Grande	2021	HW
Amoebozoa	Arcella crenulata	S29	21H	B	0	Grande	2021
Amoebozoa	Arcella megastoma	S29	21H	B	0	Grande	2021
Amoebozoa	Arcella cf megastoma	S29	21H	B	0	Grande	2021
Amoebozoa	Arcella cf conica	S29	21H	B	0	Grande	2021
Amoebozoa	Arcella gandalfi	S29	21H	B	0	Grande	2021
Amoebozoa	Arcella intermedia	S29	21H	B	0	Grande	2021
Amoebozoa	Arcella sp 4	S29	21H	B	1	Grande	2021
Amoebozoa	Arcella sp 6	S29	21H	B	0	Grande	2021
Amoebozoa	Euglypha sp	S29	21H	B	0	Grande	2021
Cladocera	Bosminopsis deitersi	S30	21H	C	0	Grande	2021
Cladocera	Bosminopsis sp	S30	21H	C	0	Grande	2021
Cladocera	Diaphanosoma sp1	S30	21H	C	0	Grande	2021
Cladocera	Bosmina longirostris	S30	21H	C	0	Grande	2021
Rotifera	Filinia longiseta	S30	21H	C	2	Grande	2021
Rotifera	Testudinella sp	S30	21H	C	0	Grande	2021
Rotifera	Testudinella cf. Ohlei	S30	21H	C	0	Grande	2021
Rotifera	Asplanchna sp1	S30	21H	C	1	Grande	2021
Rotifera	Asplanchna sp2	S30	21H	C	0	Grande	2021
Rotifera	Asplanchna sp3	S30	21H	C	0	Grande	2021
Rotifera	Macrochaetus sp	S30	21H	C	0	Grande	2021
Rotifera	Trichocerca sp1	S30	21H	C	0	Grande	2021
Rotifera	Trichocerca sp2	S30	21H	C	0	Grande	2021
Rotifera	Polyarthra cf dolichoptera	S30	21H	C	1	Grande	2021
Rotifera	Brachionus zahniseri	S30	21H	C	3	Grande	2021
Rotifera	Keratella cf cochlearis	S30	21H	C	1	Grande	2021
Rotifera	Hexarthra sp	S30	21H	C	1	Grande	2021
Rotifera	Turbellario	S30	21H	C	0	Grande	2021
Rotifera	Lecane bulla	S30	21H	C	0	Grande	2021
Rotifera	Lecane cf tenuiseta	S30	21H	C	1	Grande	2021
Rotifera	Lecane cf leontina	S30	21H	C	1	Grande	2021
Rotifera	Dipleuchlanis cf propatula	S30	21H	C	1	Grande	2021
Copepoda	Naupli	S30	21H	C	0	Grande	2021
Copepoda	Copepoda Calanoidea sp1	S30	21H	C	0	Grande	2021
Copepoda	Copepoda Calanoidea sp2	S30	21H	C	0	Grande	2021
Copepoda	Copepoda Calanoidea sp3	S30	21H	C	0	Grande	2021
Copepoda	Copepoda Cyclopoidea sp1	S30	21H	C	0	Grande	2021
Copepoda	Copepoda Cyclopoidea sp2	S30	21H	C	0	Grande	2021
Copepoda	Copepoda Cyclopoidea sp3	S30	21H	C	0	Grande	2021
Copepoda	Copepoda	S30	21H	C	0	Grande	2021
Amoebozoa	Arcella cf gibbosa	S30	21H	C	0	Grande	2021	HW
Amoebozoa	Arcella crenulata	S30	21H	C	0	Grande	2021
Amoebozoa	Arcella megastoma	S30	21H	C	0	Grande	2021
Amoebozoa	Arcella cf megastoma	S30	21H	C	0	Grande	2021
Amoebozoa	Arcella cf conica	S30	21H	C	0	Grande	2021
Amoebozoa	Arcella gandalfi	S30	21H	C	0	Grande	2021
Amoebozoa	Arcella intermedia	S30	21H	C	0	Grande	2021
Amoebozoa	Arcella sp 4	S30	21H	C	0	Grande	2021
Amoebozoa	Arcella sp 6	S30	21H	C	4	Grande	2021
Amoebozoa	Euglypha sp	S30	21H	C	0	Grande	2021
Cladocera	Bosminopsis deitersi	S31	24H	A	11	Grande	2021
Cladocera	Bosminopsis sp	S31	24H	A	22	Grande	2021
Cladocera	Diaphanosoma sp1	S31	24H	A	9	Grande	2021
Cladocera	Bosmina longirostris	S31	24H	A	10	Grande	2021
Rotifera	Filinia longiseta	S31	24H	A	2	Grande	2021
Rotifera	Testudinella sp	S31	24H	A	0	Grande	2021
Rotifera	Testudinella cf. Ohlei	S31	24H	A	0	Grande	2021
Rotifera	Asplanchna sp1	S31	24H	A	14	Grande	2021
Rotifera	Asplanchna sp2	S31	24H	A	0	Grande	2021
Rotifera	Asplanchna sp3	S31	24H	A	0	Grande	2021
Rotifera	Macrochaetus sp	S31	24H	A	0	Grande	2021
Rotifera	Trichocerca sp1	S31	24H	A	0	Grande	2021
Rotifera	Trichocerca sp2	S31	24H	A	0	Grande	2021
Rotifera	Polyarthra cf dolichoptera	S31	24H	A	7	Grande	2021
Rotifera	Brachionus zahniseri	S31	24H	A	10	Grande	2021
Rotifera	Keratella cf cochlearis	S31	24H	A	12	Grande	2021
Rotifera	Hexarthra sp	S31	24H	A	17	Grande	2021
Rotifera	Turbellario	S31	24H	A	6	Grande	2021
Rotifera	Lecane bulla	S31	24H	A	0	Grande	2021
Rotifera	Lecane cf tenuiseta	S31	24H	A	0	Grande	2021
Rotifera	Lecane cf leontina	S31	24H	A	0	Grande	2021
Rotifera	Dipleuchlanis cf propatula	S31	24H	A	0	Grande	2021
Copepoda	Naupli	S31	24H	A	6	Grande	2021
Copepoda	Copepoda Calanoidea sp1	S31	24H	A	0	Grande	2021
Copepoda	Copepoda Calanoidea sp2	S31	24H	A	0	Grande	2021
Copepoda	Copepoda Calanoidea sp3	S31	24H	A	0	Grande	2021
Copepoda	Copepoda Cyclopoidea sp1	S31	24H	A	0	Grande	2021
Copepoda	Copepoda Cyclopoidea sp2	S31	24H	A	0	Grande	2021
Copepoda	Copepoda Cyclopoidea sp3	S31	24H	A	0	Grande	2021
Copepoda	Copepoda	S31	24H	A	0	Grande	2021
Amoebozoa	Arcella cf gibbosa	S31	24H	A	0	Grande	2021	HW
Amoebozoa	Arcella crenulata	S31	24H	A	0	Grande	2021
Amoebozoa	Arcella megastoma	S31	24H	A	0	Grande	2021
Amoebozoa	Arcella cf megastoma	S31	24H	A	0	Grande	2021
Amoebozoa	Arcella cf conica	S31	24H	A	0	Grande	2021
Amoebozoa	Arcella gandalfi	S31	24H	A	0	Grande	2021
Amoebozoa	Arcella intermedia	S31	24H	A	0	Grande	2021
Amoebozoa	Arcella sp 4	S31	24H	A	0	Grande	2021
Amoebozoa	Arcella sp 6	S31	24H	A	0	Grande	2021
Amoebozoa	Euglypha sp	S31	24H	A	0	Grande	2021
Cladocera	Bosminopsis deitersi	S32	24H	B	3	Grande	2021
Cladocera	Bosminopsis sp	S32	24H	B	3	Grande	2021
Cladocera	Diaphanosoma sp1	S32	24H	B	5	Grande	2021
Cladocera	Bosmina longirostris	S32	24H	B	0	Grande	2021
Rotifera	Filinia longiseta	S32	24H	B	86	Grande	2021
Rotifera	Testudinella sp	S32	24H	B	0	Grande	2021
Rotifera	Testudinella cf. Ohlei	S32	24H	B	0	Grande	2021
Rotifera	Asplanchna sp1	S32	24H	B	4	Grande	2021
Rotifera	Asplanchna sp2	S32	24H	B	0	Grande	2021
Rotifera	Asplanchna sp3	S32	24H	B	0	Grande	2021
Rotifera	Macrochaetus sp	S32	24H	B	0	Grande	2021
Rotifera	Trichocerca sp1	S32	24H	B	0	Grande	2021
Rotifera	Trichocerca sp2	S32	24H	B	0	Grande	2021
Rotifera	Polyarthra cf dolichoptera	S32	24H	B	41	Grande	2021
Rotifera	Brachionus zahniseri	S32	24H	B	54	Grande	2021
Rotifera	Keratella cf cochlearis	S32	24H	B	5	Grande	2021
Rotifera	Hexarthra sp	S32	24H	B	62	Grande	2021
Rotifera	Turbellario	S32	24H	B	2	Grande	2021
Rotifera	Lecane bulla	S32	24H	B	0	Grande	2021
Rotifera	Lecane cf tenuiseta	S32	24H	B	0	Grande	2021
Rotifera	Lecane cf leontina	S32	24H	B	0	Grande	2021
Rotifera	Dipleuchlanis cf propatula	S32	24H	B	0	Grande	2021
Copepoda	Naupli	S32	24H	B	22	Grande	2021
Copepoda	Copepoda Calanoidea sp1	S32	24H	B	0	Grande	2021
Copepoda	Copepoda Calanoidea sp2	S32	24H	B	0	Grande	2021
Copepoda	Copepoda Calanoidea sp3	S32	24H	B	1	Grande	2021
Copepoda	Copepoda Cyclopoidea sp1	S32	24H	B	0	Grande	2021
Copepoda	Copepoda Cyclopoidea sp2	S32	24H	B	0	Grande	2021
Copepoda	Copepoda Cyclopoidea sp3	S32	24H	B	0	Grande	2021
Copepoda	Copepoda	S32	24H	B	0	Grande	2021
Amoebozoa	Arcella cf gibbosa	S32	24H	B	1	Grande	2021	HW
Amoebozoa	Arcella crenulata	S32	24H	B	0	Grande	2021
Amoebozoa	Arcella megastoma	S32	24H	B	0	Grande	2021
Amoebozoa	Arcella cf megastoma	S32	24H	B	0	Grande	2021
Amoebozoa	Arcella cf conica	S32	24H	B	0	Grande	2021
Amoebozoa	Arcella gandalfi	S32	24H	B	0	Grande	2021
Amoebozoa	Arcella intermedia	S32	24H	B	0	Grande	2021
Amoebozoa	Arcella sp 4	S32	24H	B	0	Grande	2021
Amoebozoa	Arcella sp 6	S32	24H	B	0	Grande	2021
Amoebozoa	Euglypha sp	S32	24H	B	0	Grande	2021
Cladocera	Bosminopsis deitersi	S33	24H	C	1	Grande	2021
Cladocera	Bosminopsis sp	S33	24H	C	2	Grande	2021
Cladocera	Diaphanosoma sp1	S33	24H	C	1	Grande	2021
Cladocera	Bosmina longirostris	S33	24H	C	0	Grande	2021
Rotifera	Filinia longiseta	S33	24H	C	1	Grande	2021
Rotifera	Testudinella sp	S33	24H	C	0	Grande	2021
Rotifera	Testudinella cf. Ohlei	S33	24H	C	0	Grande	2021
Rotifera	Asplanchna sp1	S33	24H	C	0	Grande	2021
Rotifera	Asplanchna sp2	S33	24H	C	0	Grande	2021
Rotifera	Asplanchna sp3	S33	24H	C	0	Grande	2021
Rotifera	Macrochaetus sp	S33	24H	C	0	Grande	2021
Rotifera	Trichocerca sp1	S33	24H	C	0	Grande	2021
Rotifera	Trichocerca sp2	S33	24H	C	0	Grande	2021
Rotifera	Polyarthra cf dolichoptera	S33	24H	C	9	Grande	2021
Rotifera	Brachionus zahniseri	S33	24H	C	12	Grande	2021
Rotifera	Keratella cf cochlearis	S33	24H	C	2	Grande	2021
Rotifera	Hexarthra sp	S33	24H	C	1	Grande	2021
Rotifera	Turbellario	S33	24H	C	0	Grande	2021
Rotifera	Lecane bulla	S33	24H	C	0	Grande	2021
Rotifera	Lecane cf tenuiseta	S33	24H	C	0	Grande	2021
Rotifera	Lecane cf leontina	S33	24H	C	0	Grande	2021
Rotifera	Dipleuchlanis cf propatula	S33	24H	C	0	Grande	2021
Copepoda	Naupli	S33	24H	C	2	Grande	2021
Copepoda	Copepoda Calanoidea sp1	S33	24H	C	0	Grande	2021
Copepoda	Copepoda Calanoidea sp2	S33	24H	C	0	Grande	2021
Copepoda	Copepoda Calanoidea sp3	S33	24H	C	0	Grande	2021
Copepoda	Copepoda Cyclopoidea sp1	S33	24H	C	0	Grande	2021
Copepoda	Copepoda Cyclopoidea sp2	S33	24H	C	0	Grande	2021
Copepoda	Copepoda Cyclopoidea sp3	S33	24H	C	0	Grande	2021
Copepoda	Copepoda	S33	24H	C	0	Grande	2021
Amoebozoa	Arcella cf gibbosa	S33	24H	C	0	Grande	2021	HW
Amoebozoa	Arcella crenulata	S33	24H	C	0	Grande	2021
Amoebozoa	Arcella megastoma	S33	24H	C	0	Grande	2021
Amoebozoa	Arcella cf megastoma	S33	24H	C	0	Grande	2021
Amoebozoa	Arcella cf conica	S33	24H	C	0	Grande	2021
Amoebozoa	Arcella gandalfi	S33	24H	C	1	Grande	2021
Amoebozoa	Arcella intermedia	S33	24H	C	0	Grande	2021
Amoebozoa	Arcella sp 4	S33	24H	C	0	Grande	2021
Amoebozoa	Arcella sp 6	S33	24H	C	0	Grande	2021
Amoebozoa	Euglypha sp	S33	24H	C	0	Grande	2021
Cladocera	Bosminopsis deitersi	S34	03H	A	8	Grande	2021
Cladocera	Bosminopsis sp	S34	03H	A	9	Grande	2021
Cladocera	Diaphanosoma sp1	S34	03H	A	2	Grande	2021
Cladocera	Bosmina longirostris	S34	03H	A	5	Grande	2021
Rotifera	Filinia longiseta	S34	03H	A	9	Grande	2021
Rotifera	Testudinella sp	S34	03H	A	0	Grande	2021
Rotifera	Testudinella cf. Ohlei	S34	03H	A	0	Grande	2021
Rotifera	Asplanchna sp1	S34	03H	A	3	Grande	2021
Rotifera	Asplanchna sp2	S34	03H	A	0	Grande	2021
Rotifera	Asplanchna sp3	S34	03H	A	0	Grande	2021
Rotifera	Macrochaetus sp	S34	03H	A	0	Grande	2021
Rotifera	Trichocerca sp1	S34	03H	A	0	Grande	2021
Rotifera	Trichocerca sp2	S34	03H	A	0	Grande	2021
Rotifera	Polyarthra cf dolichoptera	S34	03H	A	5	Grande	2021
Rotifera	Brachionus zahniseri	S34	03H	A	14	Grande	2021
Rotifera	Keratella cf cochlearis	S34	03H	A	3	Grande	2021
Rotifera	Hexarthra sp	S34	03H	A	29	Grande	2021
Rotifera	Turbellario	S34	03H	A	4	Grande	2021
Rotifera	Lecane bulla	S34	03H	A	0	Grande	2021
Rotifera	Lecane cf tenuiseta	S34	03H	A	0	Grande	2021
Rotifera	Lecane cf leontina	S34	03H	A	0	Grande	2021
Rotifera	Dipleuchlanis cf propatula	S34	03H	A	0	Grande	2021
Copepoda	Naupli	S34	03H	A	0	Grande	2021
Copepoda	Copepoda Calanoidea sp1	S34	03H	A	0	Grande	2021
Copepoda	Copepoda Calanoidea sp2	S34	03H	A	0	Grande	2021
Copepoda	Copepoda Calanoidea sp3	S34	03H	A	0	Grande	2021
Copepoda	Copepoda Cyclopoidea sp1	S34	03H	A	0	Grande	2021
Copepoda	Copepoda Cyclopoidea sp2	S34	03H	A	0	Grande	2021
Copepoda	Copepoda Cyclopoidea sp3	S34	03H	A	0	Grande	2021
Copepoda	Copepoda	S34	03H	A	0	Grande	2021
Amoebozoa	Arcella cf gibbosa	S34	03H	A	0	Grande	2021	HW
Amoebozoa	Arcella crenulata	S34	03H	A	0	Grande	2021
Amoebozoa	Arcella megastoma	S34	03H	A	0	Grande	2021
Amoebozoa	Arcella cf megastoma	S34	03H	A	0	Grande	2021
Amoebozoa	Arcella cf conica	S34	03H	A	0	Grande	2021
Amoebozoa	Arcella gandalfi	S34	03H	A	0	Grande	2021
Amoebozoa	Arcella intermedia	S34	03H	A	0	Grande	2021
Amoebozoa	Arcella sp 4	S34	03H	A	1	Grande	2021
Amoebozoa	Arcella sp 6	S34	03H	A	0	Grande	2021
Amoebozoa	Euglypha sp	S34	03H	A	0	Grande	2021
Cladocera	Bosminopsis deitersi	S35	03H	B	3	Grande	2021
Cladocera	Bosminopsis sp	S35	03H	B	6	Grande	2021
Cladocera	Diaphanosoma sp1	S35	03H	B	2	Grande	2021
Cladocera	Bosmina longirostris	S35	03H	B	5	Grande	2021
Rotifera	Filinia longiseta	S35	03H	B	20	Grande	2021
Rotifera	Testudinella sp	S35	03H	B	1	Grande	2021
Rotifera	Testudinella cf. Ohlei	S35	03H	B	1	Grande	2021
Rotifera	Asplanchna sp1	S35	03H	B	1	Grande	2021
Rotifera	Asplanchna sp2	S35	03H	B	0	Grande	2021
Rotifera	Asplanchna sp3	S35	03H	B	0	Grande	2021
Rotifera	Macrochaetus sp	S35	03H	B	0	Grande	2021
Rotifera	Trichocerca sp1	S35	03H	B	0	Grande	2021
Rotifera	Trichocerca sp2	S35	03H	B	0	Grande	2021
Rotifera	Polyarthra cf dolichoptera	S35	03H	B	28	Grande	2021
Rotifera	Brachionus zahniseri	S35	03H	B	39	Grande	2021
Rotifera	Keratella cf cochlearis	S35	03H	B	12	Grande	2021
Rotifera	Hexarthra sp	S35	03H	B	53	Grande	2021
Rotifera	Turbellario	S35	03H	B	0	Grande	2021
Rotifera	Lecane bulla	S35	03H	B	0	Grande	2021
Rotifera	Lecane cf tenuiseta	S35	03H	B	0	Grande	2021
Rotifera	Lecane cf leontina	S35	03H	B	0	Grande	2021
Rotifera	Dipleuchlanis cf propatula	S35	03H	B	0	Grande	2021
Copepoda	Naupli	S35	03H	B	8	Grande	2021
Copepoda	Copepoda Calanoidea sp1	S35	03H	B	0	Grande	2021
Copepoda	Copepoda Calanoidea sp2	S35	03H	B	0	Grande	2021
Copepoda	Copepoda Calanoidea sp3	S35	03H	B	1	Grande	2021
Copepoda	Copepoda Cyclopoidea sp1	S35	03H	B	0	Grande	2021
Copepoda	Copepoda Cyclopoidea sp2	S35	03H	B	0	Grande	2021
Copepoda	Copepoda Cyclopoidea sp3	S35	03H	B	1	Grande	2021
Copepoda	Copepoda	S35	03H	B	2	Grande	2021
Amoebozoa	Arcella cf gibbosa	S35	03H	B	0	Grande	2021	HW
Amoebozoa	Arcella crenulata	S35	03H	B	0	Grande	2021
Amoebozoa	Arcella megastoma	S35	03H	B	0	Grande	2021
Amoebozoa	Arcella cf megastoma	S35	03H	B	0	Grande	2021
Amoebozoa	Arcella cf conica	S35	03H	B	0	Grande	2021
Amoebozoa	Arcella gandalfi	S35	03H	B	0	Grande	2021
Amoebozoa	Arcella intermedia	S35	03H	B	0	Grande	2021
Amoebozoa	Arcella sp 4	S35	03H	B	0	Grande	2021
Amoebozoa	Arcella sp 6	S35	03H	B	0	Grande	2021
Amoebozoa	Euglypha sp	S35	03H	B	0	Grande	2021
Cladocera	Bosminopsis deitersi	S36	03H	C	0	Grande	2021
Cladocera	Bosminopsis sp	S36	03H	C	3	Grande	2021
Cladocera	Diaphanosoma sp1	S36	03H	C	1	Grande	2021
Cladocera	Bosmina longirostris	S36	03H	C	1	Grande	2021
Rotifera	Filinia longiseta	S36	03H	C	5	Grande	2021
Rotifera	Testudinella sp	S36	03H	C	0	Grande	2021
Rotifera	Testudinella cf. Ohlei	S36	03H	C	0	Grande	2021
Rotifera	Asplanchna sp1	S36	03H	C	3	Grande	2021
Rotifera	Asplanchna sp2	S36	03H	C	0	Grande	2021
Rotifera	Asplanchna sp3	S36	03H	C	0	Grande	2021
Rotifera	Macrochaetus sp	S36	03H	C	0	Grande	2021
Rotifera	Trichocerca sp1	S36	03H	C	0	Grande	2021
Rotifera	Trichocerca sp2	S36	03H	C	0	Grande	2021
Rotifera	Polyarthra cf dolichoptera	S36	03H	C	3	Grande	2021
Rotifera	Brachionus zahniseri	S36	03H	C	10	Grande	2021
Rotifera	Keratella cf cochlearis	S36	03H	C	4	Grande	2021
Rotifera	Hexarthra sp	S36	03H	C	10	Grande	2021
Rotifera	Turbellario	S36	03H	C	0	Grande	2021
Rotifera	Lecane bulla	S36	03H	C	0	Grande	2021
Rotifera	Lecane cf tenuiseta	S36	03H	C	0	Grande	2021
Rotifera	Lecane cf leontina	S36	03H	C	0	Grande	2021
Rotifera	Dipleuchlanis cf propatula	S36	03H	C	0	Grande	2021
Copepoda	Naupli	S36	03H	C	2	Grande	2021
Copepoda	Copepoda Calanoidea sp1	S36	03H	C	0	Grande	2021
Copepoda	Copepoda Calanoidea sp2	S36	03H	C	0	Grande	2021
Copepoda	Copepoda Calanoidea sp3	S36	03H	C	0	Grande	2021
Copepoda	Copepoda Cyclopoidea sp1	S36	03H	C	0	Grande	2021
Copepoda	Copepoda Cyclopoidea sp2	S36	03H	C	0	Grande	2021
Copepoda	Copepoda Cyclopoidea sp3	S36	03H	C	0	Grande	2021
Copepoda	Copepoda	S36	03H	C	0	Grande	2021
Amoebozoa	Arcella cf gibbosa	S36	03H	C	0	Grande	2021	HW
Amoebozoa	Arcella crenulata	S36	03H	C	0	Grande	2021
Amoebozoa	Arcella megastoma	S36	03H	C	3	Grande	2021
Amoebozoa	Arcella cf megastoma	S36	03H	C	1	Grande	2021
Amoebozoa	Arcella cf conica	S36	03H	C	0	Grande	2021
Amoebozoa	Arcella gandalfi	S36	03H	C	0	Grande	2021
Amoebozoa	Arcella intermedia	S36	03H	C	0	Grande	2021
Amoebozoa	Arcella sp 4	S36	03H	C	0	Grande	2021
Amoebozoa	Arcella sp 6	S36	03H	C	0	Grande	2021
Amoebozoa	Euglypha sp	S36	03H	C	0	Grande	2021
Cladocera	Bosminopsis deitersi	S37	06H	A	7	Grande	2021
Cladocera	Bosminopsis sp	S37	06H	A	9	Grande	2021
Cladocera	Diaphanosoma sp1	S37	06H	A	5	Grande	2021
Cladocera	Bosmina longirostris	S37	06H	A	0	Grande	2021
Rotifera	Filinia longiseta	S37	06H	A	42	Grande	2021
Rotifera	Testudinella sp	S37	06H	A	0	Grande	2021
Rotifera	Testudinella cf. Ohlei	S37	06H	A	0	Grande	2021
Rotifera	Asplanchna sp1	S37	06H	A	8	Grande	2021
Rotifera	Asplanchna sp2	S37	06H	A	9	Grande	2021
Rotifera	Asplanchna sp3	S37	06H	A	0	Grande	2021
Rotifera	Macrochaetus sp	S37	06H	A	0	Grande	2021
Rotifera	Trichocerca sp1	S37	06H	A	0	Grande	2021
Rotifera	Trichocerca sp2	S37	06H	A	0	Grande	2021
Rotifera	Polyarthra cf dolichoptera	S37	06H	A	49	Grande	2021
Rotifera	Brachionus zahniseri	S37	06H	A	143	Grande	2021
Rotifera	Keratella cf cochlearis	S37	06H	A	53	Grande	2021
Rotifera	Hexarthra sp	S37	06H	A	106	Grande	2021
Rotifera	Turbellario	S37	06H	A	0	Grande	2021
Rotifera	Lecane bulla	S37	06H	A	0	Grande	2021
Rotifera	Lecane cf tenuiseta	S37	06H	A	0	Grande	2021
Rotifera	Lecane cf leontina	S37	06H	A	0	Grande	2021
Rotifera	Dipleuchlanis cf propatula	S37	06H	A	0	Grande	2021
Copepoda	Naupli	S37	06H	A	3	Grande	2021
Copepoda	Copepoda Calanoidea sp1	S37	06H	A	0	Grande	2021
Copepoda	Copepoda Calanoidea sp2	S37	06H	A	0	Grande	2021
Copepoda	Copepoda Calanoidea sp3	S37	06H	A	1	Grande	2021
Copepoda	Copepoda Cyclopoidea sp1	S37	06H	A	0	Grande	2021
Copepoda	Copepoda Cyclopoidea sp2	S37	06H	A	0	Grande	2021
Copepoda	Copepoda Cyclopoidea sp3	S37	06H	A	0	Grande	2021
Copepoda	Copepoda	S37	06H	A	0	Grande	2021
Amoebozoa	Arcella cf gibbosa	S37	06H	A	0	Grande	2021	HW
Amoebozoa	Arcella crenulata	S37	06H	A	0	Grande	2021
Amoebozoa	Arcella megastoma	S37	06H	A	0	Grande	2021
Amoebozoa	Arcella cf megastoma	S37	06H	A	0	Grande	2021
Amoebozoa	Arcella cf conica	S37	06H	A	0	Grande	2021
Amoebozoa	Arcella gandalfi	S37	06H	A	0	Grande	2021
Amoebozoa	Arcella intermedia	S37	06H	A	0	Grande	2021
Amoebozoa	Arcella sp 4	S37	06H	A	0	Grande	2021
Amoebozoa	Arcella sp 6	S37	06H	A	0	Grande	2021
Amoebozoa	Euglypha sp	S37	06H	A	0	Grande	2021
Cladocera	Bosminopsis deitersi	S38	06H	B	2	Grande	2021
Cladocera	Bosminopsis sp	S38	06H	B	5	Grande	2021
Cladocera	Diaphanosoma sp1	S38	06H	B	6	Grande	2021
Cladocera	Bosmina longirostris	S38	06H	B	3	Grande	2021
Rotifera	Filinia longiseta	S38	06H	B	61	Grande	2021
Rotifera	Testudinella sp	S38	06H	B	0	Grande	2021
Rotifera	Testudinella cf. Ohlei	S38	06H	B	0	Grande	2021
Rotifera	Asplanchna sp1	S38	06H	B	0	Grande	2021
Rotifera	Asplanchna sp2	S38	06H	B	1	Grande	2021
Rotifera	Asplanchna sp3	S38	06H	B	0	Grande	2021
Rotifera	Macrochaetus sp	S38	06H	B	0	Grande	2021
Rotifera	Trichocerca sp1	S38	06H	B	0	Grande	2021
Rotifera	Trichocerca sp2	S38	06H	B	0	Grande	2021
Rotifera	Polyarthra cf dolichoptera	S38	06H	B	48	Grande	2021
Rotifera	Brachionus zahniseri	S38	06H	B	120	Grande	2021
Rotifera	Keratella cf cochlearis	S38	06H	B	56	Grande	2021
Rotifera	Hexarthra sp	S38	06H	B	144	Grande	2021
Rotifera	Turbellario	S38	06H	B	0	Grande	2021
Rotifera	Lecane bulla	S38	06H	B	0	Grande	2021
Rotifera	Lecane cf tenuiseta	S38	06H	B	0	Grande	2021
Rotifera	Lecane cf leontina	S38	06H	B	0	Grande	2021
Rotifera	Dipleuchlanis cf propatula	S38	06H	B	0	Grande	2021
Copepoda	Naupli	S38	06H	B	15	Grande	2021
Copepoda	Copepoda Calanoidea sp1	S38	06H	B	0	Grande	2021
Copepoda	Copepoda Calanoidea sp2	S38	06H	B	0	Grande	2021
Copepoda	Copepoda Calanoidea sp3	S38	06H	B	2	Grande	2021
Copepoda	Copepoda Cyclopoidea sp1	S38	06H	B	0	Grande	2021
Copepoda	Copepoda Cyclopoidea sp2	S38	06H	B	0	Grande	2021
Copepoda	Copepoda Cyclopoidea sp3	S38	06H	B	0	Grande	2021
Copepoda	Copepoda	S38	06H	B	2	Grande	2021
Amoebozoa	Arcella cf gibbosa	S38	06H	B	0	Grande	2021	HW
Amoebozoa	Arcella crenulata	S38	06H	B	1	Grande	2021
Amoebozoa	Arcella megastoma	S38	06H	B	1	Grande	2021
Amoebozoa	Arcella cf megastoma	S38	06H	B	0	Grande	2021
Amoebozoa	Arcella cf conica	S38	06H	B	0	Grande	2021
Amoebozoa	Arcella gandalfi	S38	06H	B	0	Grande	2021
Amoebozoa	Arcella intermedia	S38	06H	B	0	Grande	2021
Amoebozoa	Arcella sp 4	S38	06H	B	0	Grande	2021
Amoebozoa	Arcella sp 6	S38	06H	B	0	Grande	2021
Amoebozoa	Euglypha sp	S38	06H	B	0	Grande	2021
Cladocera	Bosminopsis deitersi	S39	06H	C	0	Grande	2021
Cladocera	Bosminopsis sp	S39	06H	C	1	Grande	2021
Cladocera	Diaphanosoma sp1	S39	06H	C	3	Grande	2021
Cladocera	Bosmina longirostris	S39	06H	C	0	Grande	2021
Rotifera	Filinia longiseta	S39	06H	C	9	Grande	2021
Rotifera	Testudinella sp	S39	06H	C	0	Grande	2021
Rotifera	Testudinella cf. Ohlei	S39	06H	C	0	Grande	2021
Rotifera	Asplanchna sp1	S39	06H	C	0	Grande	2021
Rotifera	Asplanchna sp2	S39	06H	C	3	Grande	2021
Rotifera	Asplanchna sp3	S39	06H	C	0	Grande	2021
Rotifera	Macrochaetus sp	S39	06H	C	0	Grande	2021
Rotifera	Trichocerca sp1	S39	06H	C	0	Grande	2021
Rotifera	Trichocerca sp2	S39	06H	C	0	Grande	2021
Rotifera	Polyarthra cf dolichoptera	S39	06H	C	14	Grande	2021
Rotifera	Brachionus zahniseri	S39	06H	C	17	Grande	2021
Rotifera	Keratella cf cochlearis	S39	06H	C	0	Grande	2021
Rotifera	Hexarthra sp	S39	06H	C	11	Grande	2021
Rotifera	Turbellario	S39	06H	C	0	Grande	2021
Rotifera	Lecane bulla	S39	06H	C	0	Grande	2021
Rotifera	Lecane cf tenuiseta	S39	06H	C	0	Grande	2021
Rotifera	Lecane cf leontina	S39	06H	C	0	Grande	2021
Rotifera	Dipleuchlanis cf propatula	S39	06H	C	0	Grande	2021
Copepoda	Naupli	S39	06H	C	0	Grande	2021
Copepoda	Copepoda Calanoidea sp1	S39	06H	C	0	Grande	2021
Copepoda	Copepoda Calanoidea sp2	S39	06H	C	0	Grande	2021
Copepoda	Copepoda Calanoidea sp3	S39	06H	C	0	Grande	2021
Copepoda	Copepoda Cyclopoidea sp1	S39	06H	C	0	Grande	2021
Copepoda	Copepoda Cyclopoidea sp2	S39	06H	C	0	Grande	2021
Copepoda	Copepoda Cyclopoidea sp3	S39	06H	C	0	Grande	2021
Copepoda	Copepoda	S39	06H	C	0	Grande	2021
Amoebozoa	Arcella cf gibbosa	S39	06H	C	0	Grande	2021	HW
Amoebozoa	Arcella crenulata	S39	06H	C	0	Grande	2021
Amoebozoa	Arcella megastoma	S39	06H	C	1	Grande	2021
Amoebozoa	Arcella cf megastoma	S39	06H	C	0	Grande	2021
Amoebozoa	Arcella cf conica	S39	06H	C	0	Grande	2021
Amoebozoa	Arcella gandalfi	S39	06H	C	0	Grande	2021
Amoebozoa	Arcella intermedia	S39	06H	C	0	Grande	2021
Amoebozoa	Arcella sp 4	S39	06H	C	0	Grande	2021
Amoebozoa	Arcella sp 6	S39	06H	C	0	Grande	2021
Amoebozoa	Euglypha sp	S39	06H	C	1	Grande	2021
Cladocera	Bosminopsis deitersi	S40	09H	A	0	Grande	2021
Cladocera	Bosminopsis sp	S40	09H	A	2	Grande	2021
Cladocera	Diaphanosoma sp1	S40	09H	A	3	Grande	2021
Cladocera	Bosmina longirostris	S40	09H	A	0	Grande	2021
Rotifera	Filinia longiseta	S40	09H	A	2	Grande	2021
Rotifera	Testudinella sp	S40	09H	A	0	Grande	2021
Rotifera	Testudinella cf. Ohlei	S40	09H	A	0	Grande	2021
Rotifera	Asplanchna sp1	S40	09H	A	4	Grande	2021
Rotifera	Asplanchna sp2	S40	09H	A	3	Grande	2021
Rotifera	Asplanchna sp3	S40	09H	A	0	Grande	2021
Rotifera	Macrochaetus sp	S40	09H	A	0	Grande	2021
Rotifera	Trichocerca sp1	S40	09H	A	0	Grande	2021
Rotifera	Trichocerca sp2	S40	09H	A	1	Grande	2021
Rotifera	Polyarthra cf dolichoptera	S40	09H	A	166	Grande	2021
Rotifera	Brachionus zahniseri	S40	09H	A	146	Grande	2021
Rotifera	Keratella cf cochlearis	S40	09H	A	186	Grande	2021
Rotifera	Hexarthra sp	S40	09H	A	135	Grande	2021
Rotifera	Turbellario	S40	09H	A	0	Grande	2021
Rotifera	Lecane bulla	S40	09H	A	0	Grande	2021
Rotifera	Lecane cf tenuiseta	S40	09H	A	0	Grande	2021
Rotifera	Lecane cf leontina	S40	09H	A	0	Grande	2021
Rotifera	Dipleuchlanis cf propatula	S40	09H	A	0	Grande	2021
Copepoda	Naupli	S40	09H	A	11	Grande	2021
Copepoda	Copepoda Calanoidea sp1	S40	09H	A	0	Grande	2021
Copepoda	Copepoda Calanoidea sp2	S40	09H	A	0	Grande	2021
Copepoda	Copepoda Calanoidea sp3	S40	09H	A	1	Grande	2021
Copepoda	Copepoda Cyclopoidea sp1	S40	09H	A	0	Grande	2021
Copepoda	Copepoda Cyclopoidea sp2	S40	09H	A	0	Grande	2021
Copepoda	Copepoda Cyclopoidea sp3	S40	09H	A	0	Grande	2021
Copepoda	Copepoda	S40	09H	A	0	Grande	2021
Amoebozoa	Arcella cf gibbosa	S40	09H	A	0	Grande	2021	HW
Amoebozoa	Arcella crenulata	S40	09H	A	2	Grande	2021
Amoebozoa	Arcella megastoma	S40	09H	A	0	Grande	2021
Amoebozoa	Arcella cf megastoma	S40	09H	A	0	Grande	2021
Amoebozoa	Arcella cf conica	S40	09H	A	0	Grande	2021
Amoebozoa	Arcella gandalfi	S40	09H	A	0	Grande	2021
Amoebozoa	Arcella intermedia	S40	09H	A	0	Grande	2021
Amoebozoa	Arcella sp 4	S40	09H	A	2	Grande	2021
Amoebozoa	Arcella sp 6	S40	09H	A	0	Grande	2021
Amoebozoa	Euglypha sp	S40	09H	A	0	Grande	2021
Cladocera	Bosminopsis deitersi	S41	09H	B	1	Grande	2021
Cladocera	Bosminopsis sp	S41	09H	B	2	Grande	2021
Cladocera	Diaphanosoma sp1	S41	09H	B	2	Grande	2021
Cladocera	Bosmina longirostris	S41	09H	B	0	Grande	2021
Rotifera	Filinia longiseta	S41	09H	B	286	Grande	2021
Rotifera	Testudinella sp	S41	09H	B	0	Grande	2021
Rotifera	Testudinella cf. Ohlei	S41	09H	B	0	Grande	2021
Rotifera	Asplanchna sp1	S41	09H	B	8	Grande	2021
Rotifera	Asplanchna sp2	S41	09H	B	1	Grande	2021
Rotifera	Asplanchna sp3	S41	09H	B	0	Grande	2021
Rotifera	Macrochaetus sp	S41	09H	B	0	Grande	2021
Rotifera	Trichocerca sp1	S41	09H	B	0	Grande	2021
Rotifera	Trichocerca sp2	S41	09H	B	0	Grande	2021
Rotifera	Polyarthra cf dolichoptera	S41	09H	B	165	Grande	2021
Rotifera	Brachionus zahniseri	S41	09H	B	197	Grande	2021
Rotifera	Keratella cf cochlearis	S41	09H	B	216	Grande	2021
Rotifera	Hexarthra sp	S41	09H	B	166	Grande	2021
Rotifera	Turbellario	S41	09H	B	0	Grande	2021
Rotifera	Lecane bulla	S41	09H	B	0	Grande	2021
Rotifera	Lecane cf tenuiseta	S41	09H	B	0	Grande	2021
Rotifera	Lecane cf leontina	S41	09H	B	0	Grande	2021
Rotifera	Dipleuchlanis cf propatula	S41	09H	B	0	Grande	2021
Copepoda	Naupli	S41	09H	B	0	Grande	2021
Copepoda	Copepoda Calanoidea sp1	S41	09H	B	0	Grande	2021
Copepoda	Copepoda Calanoidea sp2	S41	09H	B	0	Grande	2021
Copepoda	Copepoda Calanoidea sp3	S41	09H	B	0	Grande	2021
Copepoda	Copepoda Cyclopoidea sp1	S41	09H	B	0	Grande	2021
Copepoda	Copepoda Cyclopoidea sp2	S41	09H	B	0	Grande	2021
Copepoda	Copepoda Cyclopoidea sp3	S41	09H	B	0	Grande	2021
Copepoda	Copepoda	S41	09H	B	0	Grande	2021
Amoebozoa	Arcella cf gibbosa	S41	09H	B	0	Grande	2021	HW
Amoebozoa	Arcella crenulata	S41	09H	B	3	Grande	2021
Amoebozoa	Arcella megastoma	S41	09H	B	2	Grande	2021
Amoebozoa	Arcella cf megastoma	S41	09H	B	0	Grande	2021
Amoebozoa	Arcella cf conica	S41	09H	B	0	Grande	2021
Amoebozoa	Arcella gandalfi	S41	09H	B	0	Grande	2021
Amoebozoa	Arcella intermedia	S41	09H	B	0	Grande	2021
Amoebozoa	Arcella sp 4	S41	09H	B	2	Grande	2021
Amoebozoa	Arcella sp 6	S41	09H	B	0	Grande	2021
Amoebozoa	Euglypha sp	S41	09H	B	0	Grande	2021
Cladocera	Bosminopsis deitersi	S42	09H	C	0	Grande	2021
Cladocera	Bosminopsis sp	S42	09H	C	0	Grande	2021
Cladocera	Diaphanosoma sp1	S42	09H	C	0	Grande	2021
Cladocera	Bosmina longirostris	S42	09H	C	1	Grande	2021
Rotifera	Filinia longiseta	S42	09H	C	51	Grande	2021
Rotifera	Testudinella sp	S42	09H	C	0	Grande	2021
Rotifera	Testudinella cf. Ohlei	S42	09H	C	0	Grande	2021
Rotifera	Asplanchna sp1	S42	09H	C	0	Grande	2021
Rotifera	Asplanchna sp2	S42	09H	C	1	Grande	2021
Rotifera	Asplanchna sp3	S42	09H	C	0	Grande	2021
Rotifera	Macrochaetus sp	S42	09H	C	0	Grande	2021
Rotifera	Trichocerca sp1	S42	09H	C	0	Grande	2021
Rotifera	Trichocerca sp2	S42	09H	C	0	Grande	2021
Rotifera	Polyarthra cf dolichoptera	S42	09H	C	26	Grande	2021
Rotifera	Brachionus zahniseri	S42	09H	C	51	Grande	2021
Rotifera	Keratella cf cochlearis	S42	09H	C	22	Grande	2021
Rotifera	Hexarthra sp	S42	09H	C	21	Grande	2021
Rotifera	Turbellario	S42	09H	C	0	Grande	2021
Rotifera	Lecane bulla	S42	09H	C	0	Grande	2021
Rotifera	Lecane cf tenuiseta	S42	09H	C	0	Grande	2021
Rotifera	Lecane cf leontina	S42	09H	C	0	Grande	2021
Rotifera	Dipleuchlanis cf propatula	S42	09H	C	0	Grande	2021
Copepoda	Naupli	S42	09H	C	4	Grande	2021
Copepoda	Copepoda Calanoidea sp1	S42	09H	C	0	Grande	2021
Copepoda	Copepoda Calanoidea sp2	S42	09H	C	0	Grande	2021
Copepoda	Copepoda Calanoidea sp3	S42	09H	C	0	Grande	2021
Copepoda	Copepoda Cyclopoidea sp1	S42	09H	C	0	Grande	2021
Copepoda	Copepoda Cyclopoidea sp2	S42	09H	C	0	Grande	2021
Copepoda	Copepoda Cyclopoidea sp3	S42	09H	C	0	Grande	2021
Copepoda	Copepoda	S42	09H	C	0	Grande	2021
Amoebozoa	Arcella cf gibbosa	S42	09H	C	0	Grande	2021	HW
Amoebozoa	Arcella crenulata	S42	09H	C	4	Grande	2021
Amoebozoa	Arcella megastoma	S42	09H	C	1	Grande	2021
Amoebozoa	Arcella cf megastoma	S42	09H	C	0	Grande	2021
Amoebozoa	Arcella cf conica	S42	09H	C	0	Grande	2021
Amoebozoa	Arcella gandalfi	S42	09H	C	0	Grande	2021
Amoebozoa	Arcella intermedia	S42	09H	C	0	Grande	2021
Amoebozoa	Arcella sp 4	S42	09H	C	1	Grande	2021
Amoebozoa	Arcella sp 6	S42	09H	C	0	Grande	2021
Amoebozoa	Euglypha sp	S42	09H	C	0	Grande	2021
Cladocera	Bosminopsis deitersi	S43	12H	A	1	Grande	2021
Cladocera	Bosminopsis sp	S43	12H	A	1	Grande	2021
Cladocera	Diaphanosoma sp1	S43	12H	A	5	Grande	2021
Cladocera	Bosmina longirostris	S43	12H	A	1	Grande	2021
Rotifera	Filinia longiseta	S43	12H	A	6	Grande	2021
Rotifera	Testudinella sp	S43	12H	A	0	Grande	2021
Rotifera	Testudinella cf. Ohlei	S43	12H	A	0	Grande	2021
Rotifera	Asplanchna sp1	S43	12H	A	2	Grande	2021
Rotifera	Asplanchna sp2	S43	12H	A	4	Grande	2021
Rotifera	Asplanchna sp3	S43	12H	A	0	Grande	2021
Rotifera	Macrochaetus sp	S43	12H	A	0	Grande	2021
Rotifera	Trichocerca sp1	S43	12H	A	0	Grande	2021
Rotifera	Trichocerca sp2	S43	12H	A	8	Grande	2021
Rotifera	Polyarthra cf dolichoptera	S43	12H	A	81	Grande	2021
Rotifera	Brachionus zahniseri	S43	12H	A	232	Grande	2021
Rotifera	Keratella cf cochlearis	S43	12H	A	215	Grande	2021
Rotifera	Hexarthra sp	S43	12H	A	4	Grande	2021
Rotifera	Turbellario	S43	12H	A	0	Grande	2021
Rotifera	Lecane bulla	S43	12H	A	0	Grande	2021
Rotifera	Lecane cf tenuiseta	S43	12H	A	0	Grande	2021
Rotifera	Lecane cf leontina	S43	12H	A	0	Grande	2021
Rotifera	Dipleuchlanis cf propatula	S43	12H	A	0	Grande	2021
Copepoda	Naupli	S43	12H	A	28	Grande	2021
Copepoda	Copepoda Calanoidea sp1	S43	12H	A	9	Grande	2021
Copepoda	Copepoda Calanoidea sp2	S43	12H	A	1	Grande	2021
Copepoda	Copepoda Calanoidea sp3	S43	12H	A	1	Grande	2021
Copepoda	Copepoda Cyclopoidea sp1	S43	12H	A	5	Grande	2021
Copepoda	Copepoda Cyclopoidea sp2	S43	12H	A	1	Grande	2021
Copepoda	Copepoda Cyclopoidea sp3	S43	12H	A	0	Grande	2021
Copepoda	Copepoda	S43	12H	A	1	Grande	2021
Amoebozoa	Arcella cf gibbosa	S43	12H	A	0	Grande	2021	HW
Amoebozoa	Arcella crenulata	S43	12H	A	2	Grande	2021
Amoebozoa	Arcella megastoma	S43	12H	A	0	Grande	2021
Amoebozoa	Arcella cf megastoma	S43	12H	A	0	Grande	2021
Amoebozoa	Arcella cf conica	S43	12H	A	0	Grande	2021
Amoebozoa	Arcella gandalfi	S43	12H	A	0	Grande	2021
Amoebozoa	Arcella intermedia	S43	12H	A	0	Grande	2021
Amoebozoa	Arcella sp 4	S43	12H	A	0	Grande	2021
Amoebozoa	Arcella sp 6	S43	12H	A	0	Grande	2021
Amoebozoa	Euglypha sp	S43	12H	A	0	Grande	2021
Cladocera	Bosminopsis deitersi	S44	12H	B	0	Grande	2021
Cladocera	Bosminopsis sp	S44	12H	B	0	Grande	2021
Cladocera	Diaphanosoma sp1	S44	12H	B	0	Grande	2021
Cladocera	Bosmina longirostris	S44	12H	B	0	Grande	2021
Rotifera	Filinia longiseta	S44	12H	B	72	Grande	2021
Rotifera	Testudinella sp	S44	12H	B	0	Grande	2021
Rotifera	Testudinella cf. Ohlei	S44	12H	B	0	Grande	2021
Rotifera	Asplanchna sp1	S44	12H	B	1	Grande	2021
Rotifera	Asplanchna sp2	S44	12H	B	0	Grande	2021
Rotifera	Asplanchna sp3	S44	12H	B	0	Grande	2021
Rotifera	Macrochaetus sp	S44	12H	B	0	Grande	2021
Rotifera	Trichocerca sp1	S44	12H	B	0	Grande	2021
Rotifera	Trichocerca sp2	S44	12H	B	4	Grande	2021
Rotifera	Polyarthra cf dolichoptera	S44	12H	B	49	Grande	2021
Rotifera	Brachionus zahniseri	S44	12H	B	97	Grande	2021
Rotifera	Keratella cf cochlearis	S44	12H	B	70	Grande	2021
Rotifera	Hexarthra sp	S44	12H	B	37	Grande	2021
Rotifera	Turbellario	S44	12H	B	0	Grande	2021
Rotifera	Lecane bulla	S44	12H	B	0	Grande	2021
Rotifera	Lecane cf tenuiseta	S44	12H	B	0	Grande	2021
Rotifera	Lecane cf leontina	S44	12H	B	0	Grande	2021
Rotifera	Dipleuchlanis cf propatula	S44	12H	B	0	Grande	2021
Copepoda	Naupli	S44	12H	B	12	Grande	2021
Copepoda	Copepoda Calanoidea sp1	S44	12H	B	1	Grande	2021
Copepoda	Copepoda Calanoidea sp2	S44	12H	B	0	Grande	2021
Copepoda	Copepoda Calanoidea sp3	S44	12H	B	0	Grande	2021
Copepoda	Copepoda Cyclopoidea sp1	S44	12H	B	0	Grande	2021
Copepoda	Copepoda Cyclopoidea sp2	S44	12H	B	2	Grande	2021
Copepoda	Copepoda Cyclopoidea sp3	S44	12H	B	0	Grande	2021
Copepoda	Copepoda	S44	12H	B	0	Grande	2021
Amoebozoa	Arcella cf gibbosa	S44	12H	B	0	Grande	2021	HW
Amoebozoa	Arcella crenulata	S44	12H	B	1	Grande	2021
Amoebozoa	Arcella megastoma	S44	12H	B	0	Grande	2021
Amoebozoa	Arcella cf megastoma	S44	12H	B	0	Grande	2021
Amoebozoa	Arcella cf conica	S44	12H	B	1	Grande	2021
Amoebozoa	Arcella gandalfi	S44	12H	B	0	Grande	2021
Amoebozoa	Arcella intermedia	S44	12H	B	1	Grande	2021
Amoebozoa	Arcella sp 4	S44	12H	B	0	Grande	2021
Amoebozoa	Arcella sp 6	S44	12H	B	0	Grande	2021
Amoebozoa	Euglypha sp	S44	12H	B	0	Grande	2021
Cladocera	Bosminopsis deitersi	S45	12H	C	0	Grande	2021
Cladocera	Bosminopsis sp	S45	12H	C	0	Grande	2021
Cladocera	Diaphanosoma sp1	S45	12H	C	0	Grande	2021
Cladocera	Bosmina longirostris	S45	12H	C	0	Grande	2021
Rotifera	Filinia longiseta	S45	12H	C	2	Grande	2021
Rotifera	Testudinella sp	S45	12H	C	0	Grande	2021
Rotifera	Testudinella cf. Ohlei	S45	12H	C	0	Grande	2021
Rotifera	Asplanchna sp1	S45	12H	C	0	Grande	2021
Rotifera	Asplanchna sp2	S45	12H	C	0	Grande	2021
Rotifera	Asplanchna sp3	S45	12H	C	0	Grande	2021
Rotifera	Macrochaetus sp	S45	12H	C	0	Grande	2021
Rotifera	Trichocerca sp1	S45	12H	C	0	Grande	2021
Rotifera	Trichocerca sp2	S45	12H	C	1	Grande	2021
Rotifera	Polyarthra cf dolichoptera	S45	12H	C	3	Grande	2021
Rotifera	Brachionus zahniseri	S45	12H	C	11	Grande	2021
Rotifera	Keratella cf cochlearis	S45	12H	C	5	Grande	2021
Rotifera	Hexarthra sp	S45	12H	C	4	Grande	2021
Rotifera	Turbellario	S45	12H	C	0	Grande	2021
Rotifera	Lecane bulla	S45	12H	C	1	Grande	2021
Rotifera	Lecane cf tenuiseta	S45	12H	C	0	Grande	2021
Rotifera	Lecane cf leontina	S45	12H	C	0	Grande	2021
Rotifera	Dipleuchlanis cf propatula	S45	12H	C	0	Grande	2021
Copepoda	Naupli	S45	12H	C	2	Grande	2021
Copepoda	Copepoda Calanoidea sp1	S45	12H	C	0	Grande	2021
Copepoda	Copepoda Calanoidea sp2	S45	12H	C	0	Grande	2021
Copepoda	Copepoda Calanoidea sp3	S45	12H	C	0	Grande	2021
Copepoda	Copepoda Cyclopoidea sp1	S45	12H	C	0	Grande	2021
Copepoda	Copepoda Cyclopoidea sp2	S45	12H	C	0	Grande	2021
Copepoda	Copepoda Cyclopoidea sp3	S45	12H	C	0	Grande	2021
Copepoda	Copepoda	S45	12H	C	0	Grande	2021
Amoebozoa	Arcella cf gibbosa	S45	12H	C	0	Grande	2021	HW
Amoebozoa	Arcella crenulata	S45	12H	C	1	Grande	2021
Amoebozoa	Arcella megastoma	S45	12H	C	0	Grande	2021
Amoebozoa	Arcella cf megastoma	S45	12H	C	0	Grande	2021
Amoebozoa	Arcella cf conica	S45	12H	C	0	Grande	2021
Amoebozoa	Arcella gandalfi	S45	12H	C	0	Grande	2021
Amoebozoa	Arcella intermedia	S45	12H	C	0	Grande	2021
Amoebozoa	Arcella sp 4	S45	12H	C	0	Grande	2021
Amoebozoa	Arcella sp 6	S45	12H	C	0	Grande	2021
Amoebozoa	Euglypha sp	S45	12H	C	0	Grande	2021
Cladocera	Bosminopsis deitersi	S46	15H	A	1	Grande	2021
Cladocera	Bosminopsis sp	S46	15H	A	0	Grande	2021
Cladocera	Diaphanosoma sp1	S46	15H	A	0	Grande	2021
Cladocera	Bosmina longirostris	S46	15H	A	0	Grande	2021
Rotifera	Filinia longiseta	S46	15H	A	0	Grande	2021
Rotifera	Testudinella sp	S46	15H	A	0	Grande	2021
Rotifera	Testudinella cf. Ohlei	S46	15H	A	0	Grande	2021
Rotifera	Asplanchna sp1	S46	15H	A	25	Grande	2021
Rotifera	Asplanchna sp2	S46	15H	A	2	Grande	2021
Rotifera	Asplanchna sp3	S46	15H	A	0	Grande	2021
Rotifera	Macrochaetus sp	S46	15H	A	0	Grande	2021
Rotifera	Trichocerca sp1	S46	15H	A	0	Grande	2021
Rotifera	Trichocerca sp2	S46	15H	A	4	Grande	2021
Rotifera	Polyarthra cf dolichoptera	S46	15H	A	41	Grande	2021
Rotifera	Brachionus zahniseri	S46	15H	A	105	Grande	2021
Rotifera	Keratella cf cochlearis	S46	15H	A	225	Grande	2021
Rotifera	Hexarthra sp	S46	15H	A	120	Grande	2021
Rotifera	Turbellario	S46	15H	A	0	Grande	2021
Rotifera	Lecane bulla	S46	15H	A	0	Grande	2021
Rotifera	Lecane cf tenuiseta	S46	15H	A	0	Grande	2021
Rotifera	Lecane cf leontina	S46	15H	A	0	Grande	2021
Rotifera	Dipleuchlanis cf propatula	S46	15H	A	0	Grande	2021
Copepoda	Naupli	S46	15H	A	40	Grande	2021
Copepoda	Copepoda Calanoidea sp1	S46	15H	A	1	Grande	2021
Copepoda	Copepoda Calanoidea sp2	S46	15H	A	0	Grande	2021
Copepoda	Copepoda Calanoidea sp3	S46	15H	A	0	Grande	2021
Copepoda	Copepoda Cyclopoidea sp1	S46	15H	A	4	Grande	2021
Copepoda	Copepoda Cyclopoidea sp2	S46	15H	A	3	Grande	2021
Copepoda	Copepoda Cyclopoidea sp3	S46	15H	A	1	Grande	2021
Copepoda	Copepoda	S46	15H	A	1	Grande	2021
Amoebozoa	Arcella cf gibbosa	S46	15H	A	1	Grande	2021	HW
Amoebozoa	Arcella crenulata	S46	15H	A	2	Grande	2021
Amoebozoa	Arcella megastoma	S46	15H	A	0	Grande	2021
Amoebozoa	Arcella cf megastoma	S46	15H	A	0	Grande	2021
Amoebozoa	Arcella cf conica	S46	15H	A	0	Grande	2021
Amoebozoa	Arcella gandalfi	S46	15H	A	0	Grande	2021
Amoebozoa	Arcella intermedia	S46	15H	A	0	Grande	2021
Amoebozoa	Arcella sp 4	S46	15H	A	0	Grande	2021
Amoebozoa	Arcella sp 6	S46	15H	A	0	Grande	2021
Amoebozoa	Euglypha sp	S46	15H	A	0	Grande	2021
Cladocera	Bosminopsis deitersi	S47	15H	B	2	Grande	2021
Cladocera	Bosminopsis sp	S47	15H	B	1	Grande	2021
Cladocera	Diaphanosoma sp1	S47	15H	B	4	Grande	2021
Cladocera	Bosmina longirostris	S47	15H	B	0	Grande	2021
Rotifera	Filinia longiseta	S47	15H	B	120	Grande	2021
Rotifera	Testudinella sp	S47	15H	B	0	Grande	2021
Rotifera	Testudinella cf. Ohlei	S47	15H	B	0	Grande	2021
Rotifera	Asplanchna sp1	S47	15H	B	15	Grande	2021
Rotifera	Asplanchna sp2	S47	15H	B	23	Grande	2021
Rotifera	Asplanchna sp3	S47	15H	B	0	Grande	2021
Rotifera	Macrochaetus sp	S47	15H	B	0	Grande	2021
Rotifera	Trichocerca sp1	S47	15H	B	0	Grande	2021
Rotifera	Trichocerca sp2	S47	15H	B	15	Grande	2021
Rotifera	Polyarthra cf dolichoptera	S47	15H	B	84	Grande	2021
Rotifera	Brachionus zahniseri	S47	15H	B	192	Grande	2021
Rotifera	Keratella cf cochlearis	S47	15H	B	151	Grande	2021
Rotifera	Hexarthra sp	S47	15H	B	145	Grande	2021
Rotifera	Turbellario	S47	15H	B	0	Grande	2021
Rotifera	Lecane bulla	S47	15H	B	0	Grande	2021
Rotifera	Lecane cf tenuiseta	S47	15H	B	0	Grande	2021
Rotifera	Lecane cf leontina	S47	15H	B	0	Grande	2021
Rotifera	Dipleuchlanis cf propatula	S47	15H	B	0	Grande	2021
Copepoda	Naupli	S47	15H	B	10	Grande	2021
Copepoda	Copepoda Calanoidea sp1	S47	15H	B	0	Grande	2021
Copepoda	Copepoda Calanoidea sp2	S47	15H	B	0	Grande	2021
Copepoda	Copepoda Calanoidea sp3	S47	15H	B	1	Grande	2021
Copepoda	Copepoda Cyclopoidea sp1	S47	15H	B	0	Grande	2021
Copepoda	Copepoda Cyclopoidea sp2	S47	15H	B	1	Grande	2021
Copepoda	Copepoda Cyclopoidea sp3	S47	15H	B	0	Grande	2021
Copepoda	Copepoda	S47	15H	B	0	Grande	2021
Amoebozoa	Arcella cf gibbosa	S47	15H	B	0	Grande	2021	HW
Amoebozoa	Arcella crenulata	S47	15H	B	0	Grande	2021
Amoebozoa	Arcella megastoma	S47	15H	B	0	Grande	2021
Amoebozoa	Arcella cf megastoma	S47	15H	B	0	Grande	2021
Amoebozoa	Arcella cf conica	S47	15H	B	0	Grande	2021
Amoebozoa	Arcella gandalfi	S47	15H	B	0	Grande	2021
Amoebozoa	Arcella intermedia	S47	15H	B	0	Grande	2021
Amoebozoa	Arcella sp 4	S47	15H	B	1	Grande	2021
Amoebozoa	Arcella sp 6	S47	15H	B	0	Grande	2021
Amoebozoa	Euglypha sp	S47	15H	B	0	Grande	2021
Cladocera	Bosminopsis deitersi	S48	15H	C	0	Grande	2021
Cladocera	Bosminopsis sp	S48	15H	C	0	Grande	2021
Cladocera	Diaphanosoma sp1	S48	15H	C	1	Grande	2021
Cladocera	Bosmina longirostris	S48	15H	C	0	Grande	2021
Rotifera	Filinia longiseta	S48	15H	C	3	Grande	2021
Rotifera	Testudinella sp	S48	15H	C	0	Grande	2021
Rotifera	Testudinella cf. Ohlei	S48	15H	C	0	Grande	2021
Rotifera	Asplanchna sp1	S48	15H	C	0	Grande	2021
Rotifera	Asplanchna sp2	S48	15H	C	1	Grande	2021
Rotifera	Asplanchna sp3	S48	15H	C	0	Grande	2021
Rotifera	Macrochaetus sp	S48	15H	C	0	Grande	2021
Rotifera	Trichocerca sp1	S48	15H	C	0	Grande	2021
Rotifera	Trichocerca sp2	S48	15H	C	1	Grande	2021
Rotifera	Polyarthra cf dolichoptera	S48	15H	C	2	Grande	2021
Rotifera	Brachionus zahniseri	S48	15H	C	8	Grande	2021
Rotifera	Keratella cf cochlearis	S48	15H	C	6	Grande	2021
Rotifera	Hexarthra sp	S48	15H	C	1	Grande	2021
Rotifera	Turbellario	S48	15H	C	0	Grande	2021
Rotifera	Lecane bulla	S48	15H	C	0	Grande	2021
Rotifera	Lecane cf tenuiseta	S48	15H	C	0	Grande	2021
Rotifera	Lecane cf leontina	S48	15H	C	0	Grande	2021
Rotifera	Dipleuchlanis cf propatula	S48	15H	C	0	Grande	2021
Copepoda	Naupli	S48	15H	C	1	Grande	2021
Copepoda	Copepoda Calanoidea sp1	S48	15H	C	0	Grande	2021
Copepoda	Copepoda Calanoidea sp2	S48	15H	C	0	Grande	2021
Copepoda	Copepoda Calanoidea sp3	S48	15H	C	0	Grande	2021
Copepoda	Copepoda Cyclopoidea sp1	S48	15H	C	1	Grande	2021
Copepoda	Copepoda Cyclopoidea sp2	S48	15H	C	0	Grande	2021
Copepoda	Copepoda Cyclopoidea sp3	S48	15H	C	0	Grande	2021
Copepoda	Copepoda	S48	15H	C	0	Grande	2021
Amoebozoa	Arcella cf gibbosa	S48	15H	C	0	Grande	2021	HW
Amoebozoa	Arcella crenulata	S48	15H	C	0	Grande	2021
Amoebozoa	Arcella megastoma	S48	15H	C	0	Grande	2021
Amoebozoa	Arcella cf megastoma	S48	15H	C	0	Grande	2021
Amoebozoa	Arcella cf conica	S48	15H	C	0	Grande	2021
Amoebozoa	Arcella gandalfi	S48	15H	C	0	Grande	2021
Amoebozoa	Arcella intermedia	S48	15H	C	1	Grande	2021
Amoebozoa	Arcella sp 4	S48	15H	C	0	Grande	2021
Amoebozoa	Arcella sp 6	S48	15H	C	0	Grande	2021
Amoebozoa	Euglypha sp	S48	15H	C	0	Grande	2021
Cladocera	Bosminopsis deitersi	S49	18H	A	2	Delfincocha	2022
Cladocera	Ilyocryptus (spinifer)	S49	18H	A	0	Delfincocha	2022
Cladocera	Moina sp3	S49	18H	A	0	Delfincocha	2022
Cladocera	Filinia longiseta	S49	18H	A	16	Delfincocha	2022
Rotifera	Testudinella sp	S49	18H	A	3	Delfincocha	2022
Rotifera	Testudinella cf. Ohlei	S49	18H	A	0	Delfincocha	2022
Rotifera	Asplanchna sp1	S49	18H	A	2	Delfincocha	2022
Rotifera	Asplanchna sp2	S49	18H	A	3	Delfincocha	2022
Rotifera	Asplanchna sp3	S49	18H	A	33	Delfincocha	2022
Rotifera	Macrochaetus sp	S49	18H	A	0	Delfincocha	2022
Rotifera	Trichocerca sp2	S49	18H	A	0	Delfincocha	2022
Rotifera	Polyarthra cf dolichoptera	S49	18H	A	9	Delfincocha	2022
Rotifera	Brachionus zahniseri	S49	18H	A	7	Delfincocha	2022
Rotifera	Scaridium sp	S49	18H	A	0	Delfincocha	2022
Rotifera	Heliozoa cf protis	S49	18H	A	2	Delfincocha	2022
Rotifera	Platyas cf quadricornis	S49	18H	A	0	Delfincocha	2022
Rotifera	Platyas sp1	S49	18H	A	0	Delfincocha	2022
Rotifera	Lecane bulla	S49	18H	A	0	Delfincocha	2022
Rotifera	Lecane cf tenuiseta	S49	18H	A	1	Delfincocha	2022
Rotifera	Lecane Monostyla sp3	S49	18H	A	0	Delfincocha	2022
Rotifera	Lecane sp1	S49	18H	A	0	Delfincocha	2022
Rotifera	Lecane sp2	S49	18H	A	0	Delfincocha	2022
Rotifera	Lecane cf leontina	S49	18H	A	0	Delfincocha	2022
Rotifera	Dipleuchlanis cf propatula	S49	18H	A	4	Delfincocha	2022
Rotifera	Lecane sp6	S49	18H	A	0	Delfincocha	2022
Copepoda	Naupli	S49	18H	A	16	Delfincocha	2022
Amoebozoa	Arcella cf gibbosa	S49	18H	A	4	Delfincocha	2022	RW
Amoebozoa	Arcella crenulata	S49	18H	A	0	Delfincocha	2022
Amoebozoa	Arcella cf megastoma	S49	18H	A	0	Delfincocha	2022
Amoebozoa	Arcella cf conica	S49	18H	A	11	Delfincocha	2022
Amoebozoa	Arcella gandalfi	S49	18H	A	1	Delfincocha	2022
Amoebozoa	Arcella sp2	S49	18H	A	2	Delfincocha	2022
Amoebozoa	Arcella intermedia	S49	18H	A	0	Delfincocha	2022
Amoebozoa	Arcella sp 3	S49	18H	A	0	Delfincocha	2022
Amoebozoa	Arcella sp 4	S49	18H	A	0	Delfincocha	2022
Amoebozoa	Arcella sp 5	S49	18H	A	0	Delfincocha	2022
Amoebozoa	Arcella sp 7	S49	18H	A	0	Delfincocha	2022
Amoebozoa	Arcella sp 8	S49	18H	A	0	Delfincocha	2022
Amoebozoa	Arcella sp 9	S49	18H	A	0	Delfincocha	2022
Amoebozoa	Arcella sp 10	S49	18H	A	0	Delfincocha	2022
Amoebozoa	Arcella sp 11	S49	18H	A	3	Delfincocha	2022
Amoebozoa	Arcella sp 12	S49	18H	A	0	Delfincocha	2022
Amoebozoa	Euglypha sp	S49	18H	A	0	Delfincocha	2022
Cladocera	Bosminopsis deitersi	S50	18H	B	1	Delfincocha	2022
Cladocera	Ilyocryptus (spinifer)	S50	18H	B	0	Delfincocha	2022
Cladocera	Moina sp3	S50	18H	B	0	Delfincocha	2022
Cladocera	Filinia longiseta	S50	18H	B	18	Delfincocha	2022
Rotifera	Testudinella sp	S50	18H	B	3	Delfincocha	2022
Rotifera	Testudinella cf. Ohlei	S50	18H	B	0	Delfincocha	2022
Rotifera	Asplanchna sp1	S50	18H	B	2	Delfincocha	2022
Rotifera	Asplanchna sp2	S50	18H	B	12	Delfincocha	2022
Rotifera	Asplanchna sp3	S50	18H	B	11	Delfincocha	2022
Rotifera	Macrochaetus sp	S50	18H	B	0	Delfincocha	2022
Rotifera	Trichocerca sp2	S50	18H	B	0	Delfincocha	2022
Rotifera	Polyarthra cf dolichoptera	S50	18H	B	4	Delfincocha	2022
Rotifera	Brachionus zahniseri	S50	18H	B	0	Delfincocha	2022
Rotifera	Scaridium sp	S50	18H	B	0	Delfincocha	2022
Rotifera	Heliozoa cf protis	S50	18H	B	9	Delfincocha	2022
Rotifera	Platyas cf quadricornis	S50	18H	B	0	Delfincocha	2022
Rotifera	Platyas sp1	S50	18H	B	0	Delfincocha	2022
Rotifera	Lecane bulla	S50	18H	B	2	Delfincocha	2022
Rotifera	Lecane cf tenuiseta	S50	18H	B	0	Delfincocha	2022
Rotifera	Lecane Monostyla sp3	S50	18H	B	0	Delfincocha	2022
Rotifera	Lecane sp1	S50	18H	B	1	Delfincocha	2022
Rotifera	Lecane sp2	S50	18H	B	0	Delfincocha	2022
Rotifera	Lecane cf leontina	S50	18H	B	0	Delfincocha	2022
Rotifera	Dipleuchlanis cf propatula	S50	18H	B	0	Delfincocha	2022
Rotifera	Lecane sp6	S50	18H	B	0	Delfincocha	2022
Copepoda	Naupli	S50	18H	B	1	Delfincocha	2022
Amoebozoa	Arcella cf gibbosa	S50	18H	B	9	Delfincocha	2022	RW
Amoebozoa	Arcella crenulata	S50	18H	B	2	Delfincocha	2022
Amoebozoa	Arcella cf megastoma	S50	18H	B	0	Delfincocha	2022
Amoebozoa	Arcella cf conica	S50	18H	B	15	Delfincocha	2022
Amoebozoa	Arcella gandalfi	S50	18H	B	0	Delfincocha	2022
Amoebozoa	Arcella sp2	S50	18H	B	0	Delfincocha	2022
Amoebozoa	Arcella intermedia	S50	18H	B	4	Delfincocha	2022
Amoebozoa	Arcella sp 3	S50	18H	B	3	Delfincocha	2022
Amoebozoa	Arcella sp 4	S50	18H	B	0	Delfincocha	2022
Amoebozoa	Arcella sp 5	S50	18H	B	0	Delfincocha	2022
[truncated: 1,697 more rows]
