# Supplementary material
Source: MDPI journal article supplement (https://www.mdpi.com/2073-4441/16/8/1166)

**Figure S1: Distribution of clade abundances by depth stratum and time of the day in Grande Lake.**

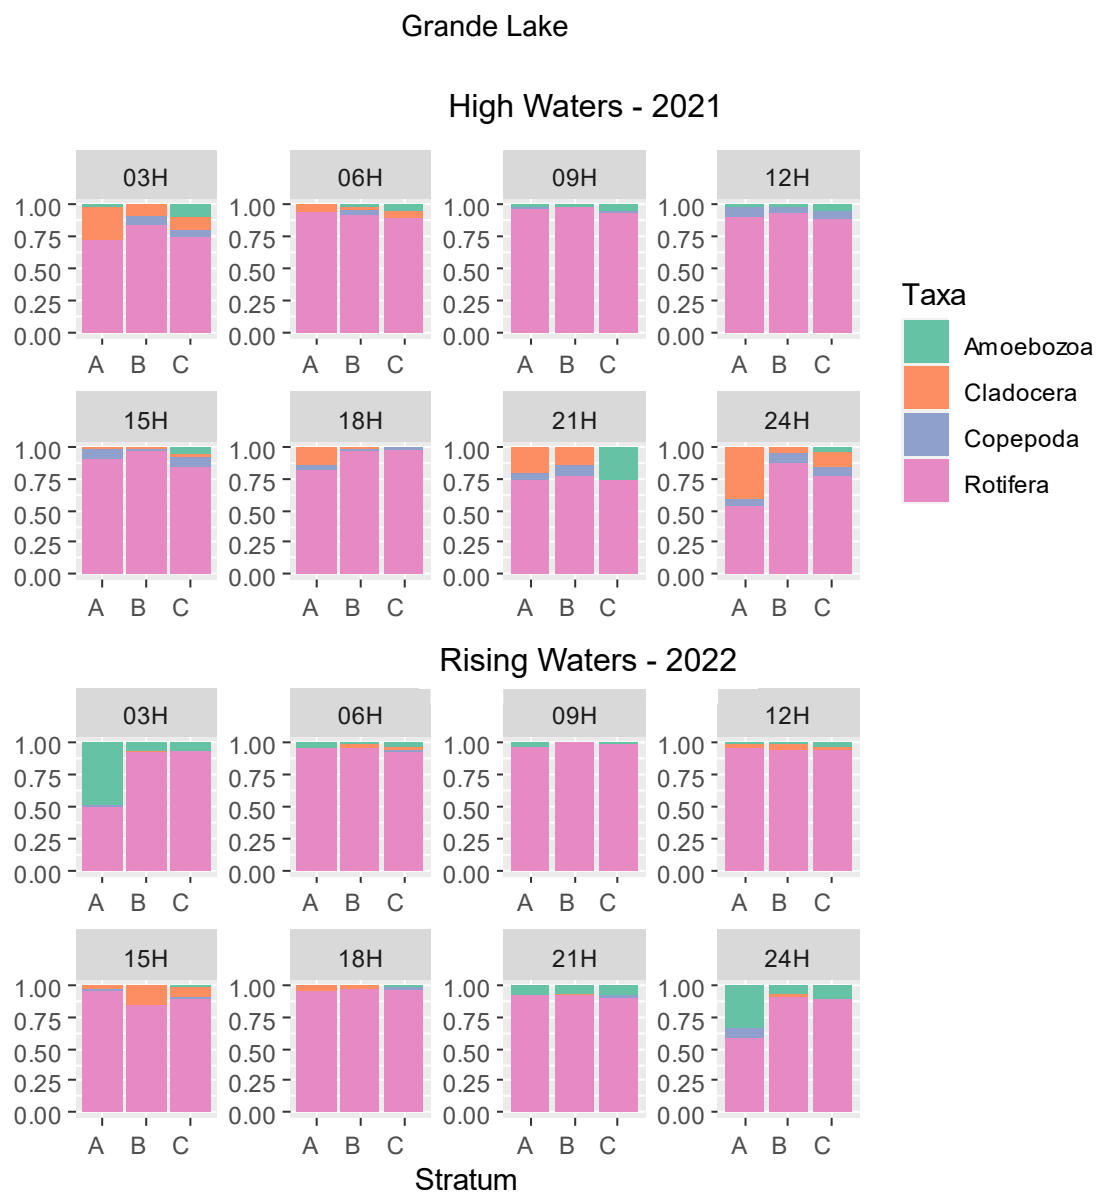

Supplement: s1 [file s1]
